# Supplementary material for: Resveratrol accumulation and its involvement in stilbene synthetic pathway of Chinese wild grapes during berry development using quantitative proteome analysis
Source: PubMed Central journal article supplement (PMC5571159; doi:10.1038/s41598-017-10171-x), 2017-08-24
Supplement: 41598_2017_10171_MOESM1_ESM.pdf [file 41598_2017_10171_MOESM1_ESM.pdf]

## Supplementary information

Resveratrol accumulation and its involvement in stilbene synthetic pathway of Chinese wild grapes during berry development using quantitative proteome analysis

Ruimin Li<sup>a,b,c,†</sup>, Xiaoqing Xie<sup>a,b,c,†</sup>, Fuli Ma<sup>a,b,c,†</sup>, Dan Wang<sup>a,b,c</sup>, Lan Wang<sup>a,b,c</sup>, Jianxia Zhang<sup>a,b,c</sup>, Yan Xu<sup>a,b,c</sup>, Xiping Wang<sup>a,b,c</sup>, Chaohong Zhang<sup>a,b,c\*</sup>, Yuejin Wang<sup>a,b,c\*</sup>

<sup>a</sup> College of Horticulture, Northwest A&F University, Yangling, Shaanxi, 712100, the People's Republic of China

<sup>b</sup> Key Laboratory of Horticultural Plant Biology and Germplasm Innovation in Northwest China, Ministry of Agriculture, Yangling, Shaanxi 712100, the People's Republic of China

<sup>c</sup> State Key Laboratory of Crop Stress Biology in Arid Areas, Northwest A&F University, Yangling, Shaanxi, 712100, the People's Republic of China

\*Corresponding author: Chaohong Zhang

E-mail: zhangchaohong@nwsuaf.edu.cn

\*Corresponding author: Yuejin Wang

E-mail: [wangyj@nwsuaf.edu.cn](mailto:wangyj@nwsuaf.edu.cn)

Tel: +86-29-87082522; Fax: +86-29-87082522

## Supplementary Figures and Tables

Supplementary figure 1. Protein samples detected by SDS-PAGE gel. A1, A2, A3, three biological repeats of Green hard stage of *Vitis quinquangularis* accession Danfeng-2 and *V. vinifera* cv. Cabernet Sauvignon. B1, B2, B3, three biological repeats of Before Veraison stage of Danfeng-2. C1, C2, C3, three biological repeats of Veraison stage of Danfeng-2. D1, D2, D3, three biological repeats of Ripe stage of Danfeng-2. K1, K2, K3, three biological repeats of Green hard stage of Cabernet Sauvignon. L1, L2, L3, three biological repeats of Before Veraison stage of Cabernet Sauvignon. M1, M2, M3, three biological repeats of Veraison stage of Cabernet Sauvignon. N1, N2, N3, three biological repeats of Ripe stage of Cabernet Sauvignon.

Supplementary figure 2. Peptide fractionation using strong cation exchange. A,B,C represent three biological repeats of iTRAQ experiments.

Supplementary figure 3. Protein samples detected by Mass spectra (MALDI-TOF). A, Green hard stage of Danfeng-2. B, Before Veraison stage of Danfeng-2. C, Veraison stage of Danfeng-2. D, Ripe stage of Danfeng-2. E, Green hard stage of Cabernet Sauvignon. F, Before

Veraison stage of Cabernet Sauvignon. G, Veraison stage of Cabernet Sauvignon. H, Ripe stage of Cabernet Sauvignon.

Supplementary figure 4. Data repeatability of iTRAQ experiments of berry developmental stages of *Vitis quinquangularis* accession Danfeng-2 and *V. vinifera* cv. Cabernet Sauvignon. The Ratio at each development stage A) Green hard, B) Before veraison, C) Veraison, D) Ripe, of the three experiments between *Vitis quinquangularis* accession Danfeng-2 and *V. vinifera* cv. Cabernet Sauvignon are plotted in a correlation scatter diagram and the correlation coefficient R values were calculated. Three independent biological replicates are labeled as a, b, and c. 113, 114, 115, 116, 117, 118, 119, 121, samples number of different developmental stages of *Vitis quinquangularis* accession Danfeng-2 and *V. vinifera* cv. Cabernet Sauvignon (as indicated in Fig.1A).

Supplementary Table S1. Primers used in the present study.

Note: Primers were designed with Primer Premier 5.0 and used for qRT-PCR in Figure. 8 and Supplementary Table S6.

Supplementary Table S2. List of peptides identified and quantified in the iTRAQ experiments.

Note: Three independent biological replicates were labeled as a, b, and c. 113, 114, 115, 116, 117, 118, 119, 121, samples number of different developmental stages of Danfeng-2 and Cabernet Sauvignon (as indicated in Fig.1A).

Supplementary Table S3. List of proteins identified and quantified in the iTRAQ experiments.

Note: Three independent biological replicates were labeled as a, b, and c. 113, 114, 115, 116, 117, 118, 119, 121, samples number of different developmental stages of Danfeng-2 and Cabernet Sauvignon (as indicated in Fig.1A).

Supplementary Table S4. Differentially expressed proteins between Danfeng-2 and Cabernet Sauvignon at four developmental stages.

Note: \*, significant differentially expressed proteins ( $p$ -value < 0.05). 'up' means up-regulated profile and 'down' means down-regulated profile in Danfeng-2. GH, green hard, BV, before veraison, V, veraison, and R, ripe. Three independent biological replicates were labeled as a, b, and c. 113, 114, 115, 116, 117, 118, 119, 121, samples number of different developmental stages of Danfeng-2 and Cabernet Sauvignon (as indicated in Fig.1A).

Supplementary Table S5 Enriched GO terms of differential expressed proteins between Danfeng-2 and Cabernet Sauvignon.

Note: Enriched GO terms were generated in agriGO with customized annotation as reference. *p-values* were converted with *Z*-score generated by z-test. FDR were generated as p-value with multiple test correction.

Supplementary Table S6. Comparison of protein and mRNA expression pattern of 15 candidate proteins (genes) at different developmental stages.

Note: RT-PCR data are log2 normalized  $2^{-\Delta\Delta Ct}$  values. Relationships of proteins with qRT-PCR transcripts are indicated.

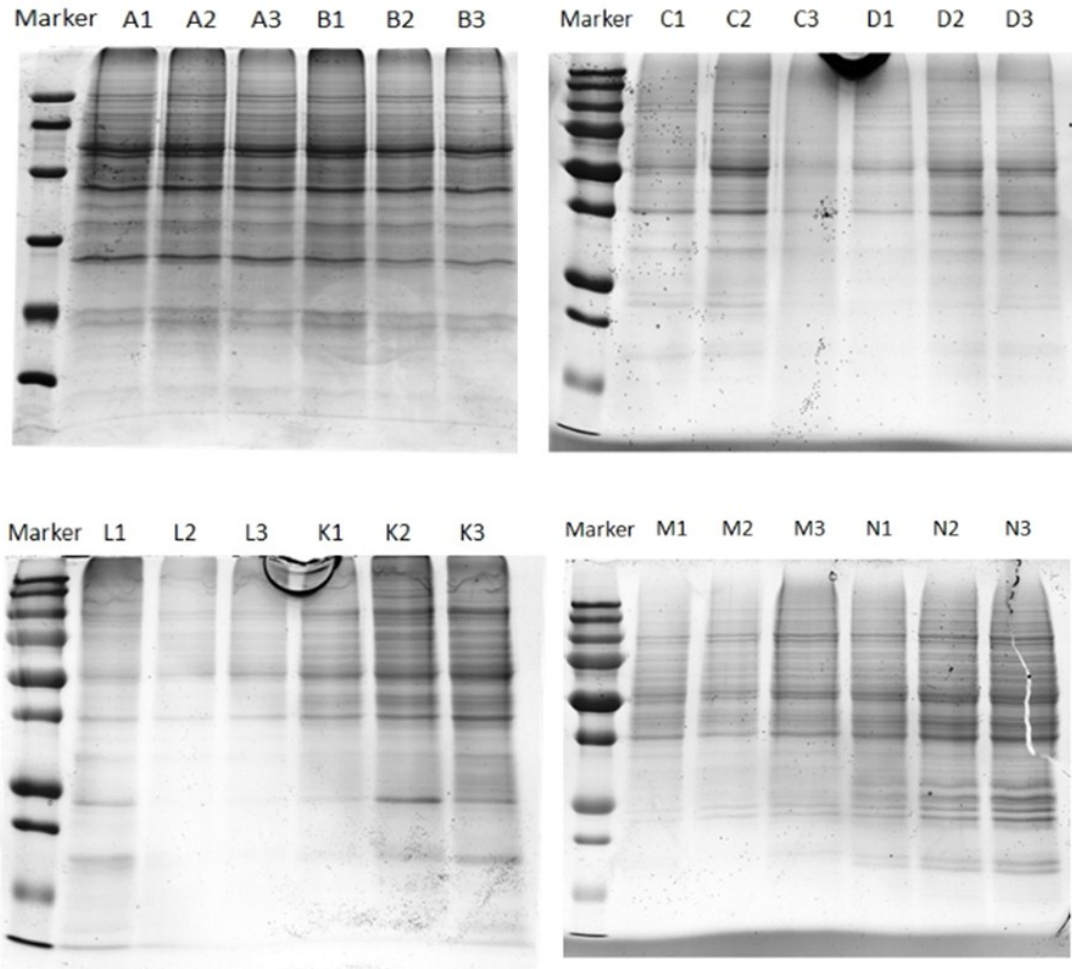

Supplementary figure 1. Protein samples detected by SDS-PAGE gel. A1, A2, A3, three biological repeats of Green hard stage of *Vitis*

*quinquangularis* accession Danfeng-2 and *V. vinifera* cv. Cabernet Sauvignon. B1, B2, B3, three biological repeats of Before Veraison stage of Danfeng-2. C1, C2, C3, three biological repeats of Veraison stage of Danfeng-2. D1, D2, D3, three biological repeats of Ripe stage of Danfeng-2. K1, K2, K3, three biological repeats of Green hard stage of Cabernet Sauvignon. L1, L2, L3, three biological repeats of Before Veraison stage of Cabernet Sauvignon. M1, M2, M3, three biological repeats of Veraison stage of Cabernet Sauvignon. N1, N2, N3, three biological repeats of Ripe stage of Cabernet Sauvignon.

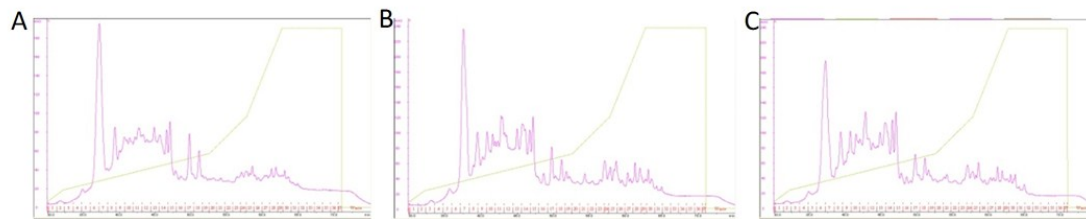

Supplementary figure 2. Peptide fractionation using strong cation exchange. A,B,C represent three biological repeats of iTRAQ experiments.



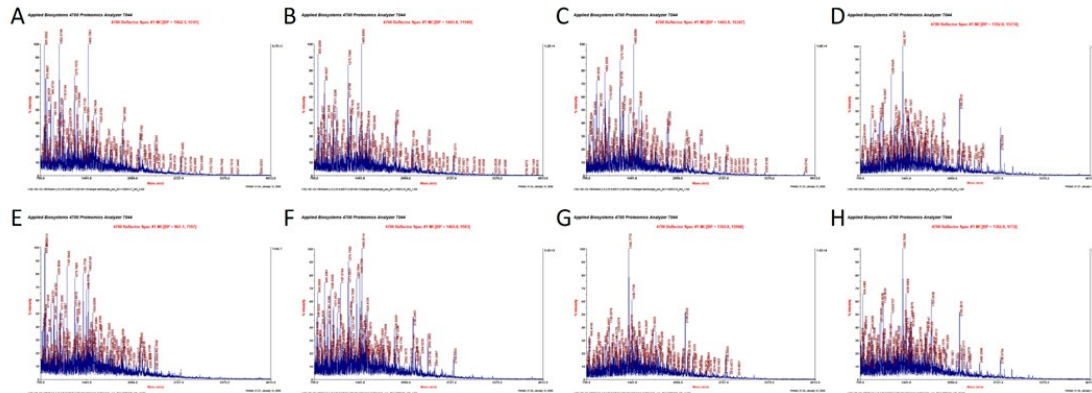

Supplementary figure 3. Protein samples detected by Mass spectra (MALDI-TOF). A, Green hard stage of Danfeng-2. B, Before Veraison stage of Danfeng-2. C, Veraison stage of Danfeng-2. D, Ripe stage of Danfeng-2. E, Green hard stage of Cabernet Sauvignon. F, Before Veraison stage of Cabernet Sauvignon. G, Veraison stage of Cabernet Sauvignon. H, Ripe stage of Cabernet Sauvignon.

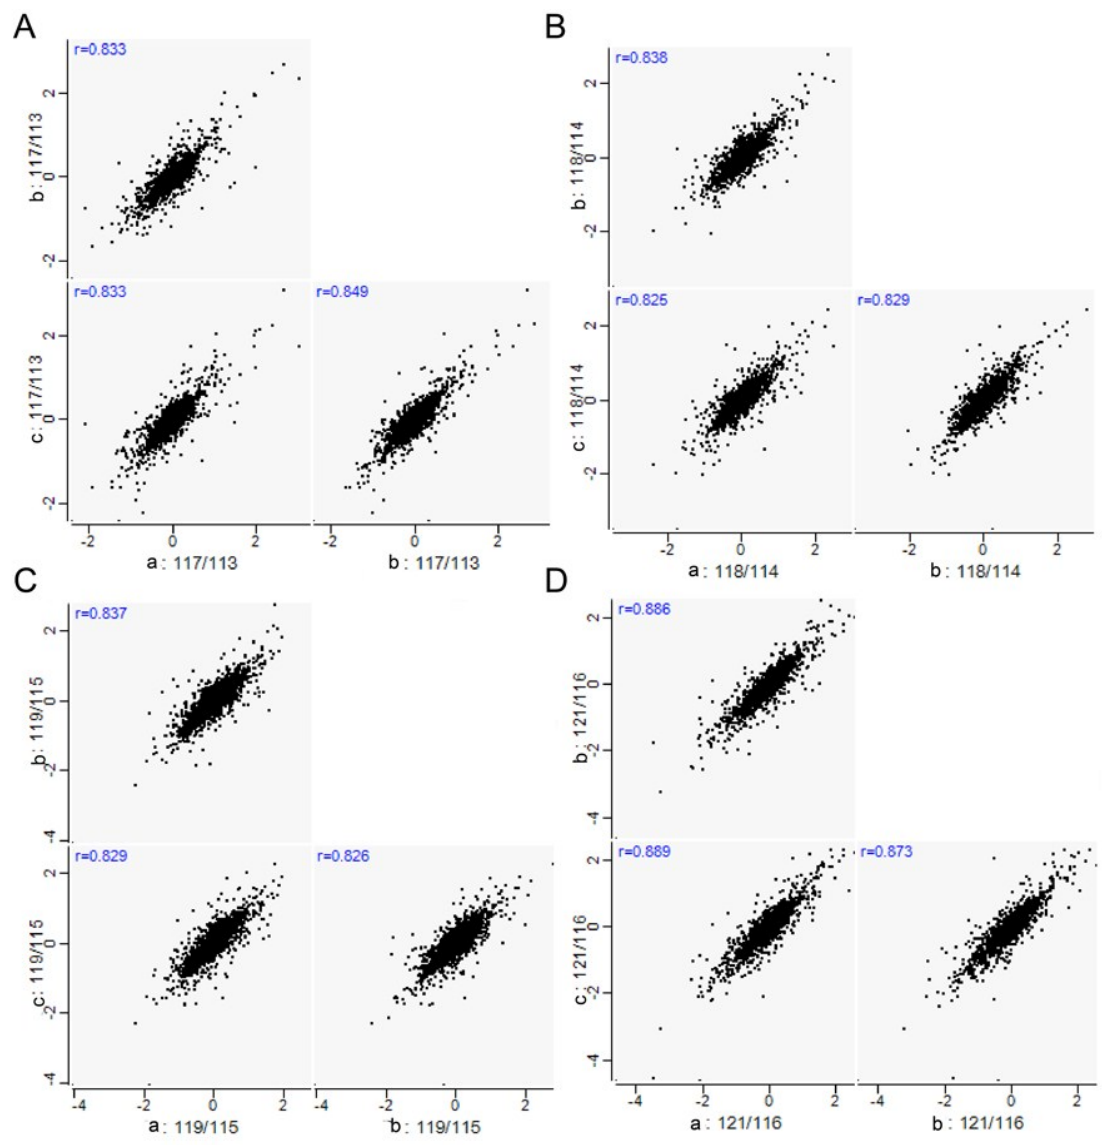

Supplementary figure 4. Data repeatability of iTRAQ experiments of berry developmental stages of *Vitis quinquangularis* accession Danfeng-2 and *V. vinifera* cv. Cabernet Sauvignon. The Ratio at each development stage A) Green hard, B) Before veraison, C) Veraison, D) Ripe, of the three experiments between *Vitis quinquangularis* accession Danfeng-2 and *V. vinifera* cv. Cabernet Sauvignon are plotted in a correlation scatter diagram and the correlation coefficient R values were calculated. Three independent biological replicates are labeled as a, b, and c. 113, 114, 115, 116, 117, 118, 119, 121, samples number of different developmental stages of *Vitis quinquangularis* accession Danfeng-2 and *V. vinifera* cv. Cabernet Sauvignon (as indicated in Fig.1A).

**Supplementary Table s1.** Primers used in the present study

| Gene Name_Forward or _Reverse Primer | Primer Sequence            |
|--------------------------------------|----------------------------|
| UFGT_Forward                         | TAACACATTGTGGATGGAACATCAT  |
| UFGT_Reverse                         | ACCTTCAATTCTCACTCCAATCTC   |
| MYBA1_Forward                        | GAGGGTGATTTTCCATTTGAT      |
| MYBA1_Reverse                        | CAAGAACAACTTTTGAACTTAAACAT |
| MYB14_Forward                        | TCTGAGGCCGGATATCAAAC       |
| MYB14_Reverse                        | GGGACGCATCAAGAGAGTGT       |
| MYB15_Forward                        | CAAGAATGAACAGATGGAGGAG     |
| MYB15_Reverse                        | TCTGCGACTGCTGGGAAA         |
| MYB5a_Forward                        | CTAGAACTGTCTGGGAACCT       |
| MYB5a_Reverse                        | TGCAAGGATCCATTTACATAC      |
| MYB5b_Forward                        | TGACAGCCGGTGTCTTTAAT       |
| MYB5b_Reverse                        | AGCATACTAACACAACAACAACC    |
| MYBPA1_Forward                       | AGATCAACTGGTTATGCTTGCT     |
| MYBPA1_Reverse                       | AACACAAATGTACATCGCACAC     |
| CHS_Forward                          | CATCACAAATAGCGAACACAAG     |
| CHS_Reverse                          | CCTAGCATCCAGGGAAGC         |
| STS_Forward                          | CAAGCCCTTTTTGGTGATG        |
| STS_Reverse                          | CCACAAGTGAAAGGTGAGTCC      |
| F35H1_Forward                        | TTCTTGAAAATGGGCACTAACA     |
| F35H1_Reverse                        | CGCTCGCTGGCACAACCT         |
| F35H2_Forward                        | TGCTGATGGAACGCCTG          |
| F35H2_Reverse                        | CATTTGTCTGACTTTTTTGGG      |
| F3H_Forward                          | TGTCTGGTGGCAAGAAAGG        |
| F3H_Reverse                          | CAAGCATTGGTCAAAGCGT        |

|                |                         |
|----------------|-------------------------|
| LDOX_Forward   | TGGAGTGGGGTGTGATGC      |
| LDOX_Reverse   | GGTGTCTTAGGCCAGATGGT    |
| CHI1_Forward   | GGAAGGGTAAATCTGGAAAGG   |
| CHI1_Reverse   | GCATGAAGTTGCAGGAAAATG   |
| CHI2_Forward   | GCTCCACCAACGACCTCTT     |
| CHI2_Reverse   | TCCTCCACAGTCTTGCCCT     |
| DFR_Forward    | GCGGAGACGCATCTGACT      |
| DFR_Reverse    | GCCCAACATCCCTTCAATA     |
| C4H_Forward    | ACCACCTGAACCTCTCCGA     |
| C4H_Reverse    | CGCCAATGCTCACCGTA       |
| UBC32_Forward  | CAAGAGTGGCTGACAGGATAG   |
| UBC32_Reverse  | CTTGATACAGGGCTGGGATTAG  |
| LRR_Forward    | GGCCAACCTGGTAAACAGAATA  |
| LRR_Reverse    | CGGAGGTTCTGCAGGTAAT     |
| GRP_Forward    | CTGTTGTTCTCATCCTGTCCTC  |
| GRP_Reverse    | CCCATCGTGCTTCTCATCTT    |
| PIP2;3_Forward | CTGGAGTGACCATTGGGTATTT  |
| PIP2;3_Reverse | AACAGCTCCAGCTCTCAATATG  |
| USP_Forward    | GTTCTTGGGAGCAGAGGTTTAG  |
| USP_Reverse    | TCACAACTGTAAGTGGACATGAG |
| RSGT_Forward   | CTACCATGGCTTAGTCCCTTTC  |
| RSGT_Reverse   | AGCTGGCGATTTTCATCATACT  |
| GAPDH_Forward  | TTCTCGTTGAGGGCTATTCCA   |
| GAPDH_Reverse  | CCACAGACTTCATCGGTGACA   |

---

**Note: Primers were designed with Primer Premier 5.0 and used for qRT-PCR in Figure. 8 and Supplementary Table S6.**

**Supplementary Table s5. Enriched GO terms of differential expressed proteins between Danfeng-2 and Cabernet Sauvignon**

| GO term    | Ontology | Description                                  | Number in input list | Number in BG/Ref | p-value  | FDR      |
|------------|----------|----------------------------------------------|----------------------|------------------|----------|----------|
| GO:0015979 | P        | photosynthesis                               | 40                   | 162              | 6.30E-35 | 1.50E-31 |
| GO:0044237 | P        | cellular metabolic process                   | 239                  | 8722             | 2.90E-32 | 3.50E-29 |
| GO:0009987 | P        | cellular process                             | 283                  | 11684            | 5.10E-31 | 4.10E-28 |
| GO:0008152 | P        | metabolic process                            | 266                  | 10614            | 1.00E-30 | 6.10E-28 |
| GO:0044262 | P        | cellular carbohydrate metabolic process      | 49                   | 417              | 3.60E-29 | 1.80E-26 |
| GO:0006082 | P        | organic acid metabolic process               | 62                   | 860              | 7.40E-26 | 3.00E-23 |
| GO:0034641 | P        | cellular nitrogen compound metabolic process | 49                   | 506              | 1.00E-25 | 3.50E-23 |
| GO:0043436 | P        | oxoacid metabolic process                    | 61                   | 859              | 3.90E-25 | 1.10E-22 |
| GO:0019752 | P        | carboxylic acid metabolic process            | 61                   | 859              | 3.90E-25 | 1.10E-22 |
| GO:0005975 | P        | carbohydrate metabolic process               | 61                   | 866              | 5.90E-25 | 1.40E-22 |
| GO:0042180 | P        | cellular ketone metabolic process            | 61                   | 882              | 1.40E-24 | 3.20E-22 |
| GO:000     | P        | alcohol metabolic process                    | 37                   | 270              | 2.30E    | 4.40E    |

|        |   |                                                      |     |      |       |       |  |     |     |
|--------|---|------------------------------------------------------|-----|------|-------|-------|--|-----|-----|
| 6066   |   |                                                      |     |      |       |       |  | -24 | -22 |
| GO:000 | P | cellular amino acid and derivative metabolic process | 54  | 682  | 2.20E | 4.40E |  |     |     |
| 6519   |   |                                                      |     |      |       |       |  | -24 | -22 |
| GO:000 | P | monosaccharide metabolic process                     | 30  | 168  | 6.70E | 1.20E |  |     |     |
| 5996   |   |                                                      |     |      |       |       |  | -23 | -20 |
| GO:004 | P | primary metabolic process                            | 221 | 8995 | 1.40E | 2.30E |  |     |     |
| 4238   |   |                                                      |     |      |       |       |  | -22 | -20 |
| GO:000 | P | generation of precursor metabolites and energy       | 35  | 285  | 1.10E | 1.60E |  |     |     |
| 6091   |   |                                                      |     |      |       |       |  | -21 | -19 |
| GO:004 | P | cellular catabolic process                           | 52  | 746  | 3.40E | 4.90E |  |     |     |
| 4248   |   |                                                      |     |      |       |       |  | -21 | -19 |
| GO:003 | P | cellular macromolecular complex assembly             | 28  | 200  | 6.00E | 8.10E |  |     |     |
| 4622   |   |                                                      |     |      |       |       |  | -19 | -17 |
| GO:001 | P | photosynthesis, light reaction                       | 22  | 103  | 1.40E | 1.70E |  |     |     |
| 9684   |   |                                                      |     |      |       |       |  | -18 | -16 |
| GO:006 | P | macromolecular complex assembly                      | 28  | 210  | 1.90E | 2.30E |  |     |     |
| 5003   |   |                                                      |     |      |       |       |  | -18 | -16 |
| GO:004 | P | cellular amine metabolic process                     | 37  | 438  | 7.30E | 8.40E |  |     |     |
| 4106   |   |                                                      |     |      |       |       |  | -18 | -16 |
| GO:003 | P | cellular macromolecular complex subunit organization | 28  | 224  | 8.80E | 9.70E |  |     |     |
| 4621   |   |                                                      |     |      |       |       |  | -18 | -16 |
| GO:004 | P | cellular component biogenesis                        | 41  | 571  | 2.40E | 2.60E |  |     |     |
| 4085   |   |                                                      |     |      |       |       |  | -17 | -15 |
| GO:004 | P | macromolecular complex subunit organization          | 28  | 235  | 2.70E | 2.80E |  |     |     |
| 3933   |   |                                                      |     |      |       |       |  | -17 | -15 |
| GO:000 | P | amine metabolic process                              | 39  | 521  | 4.10E | 4.00E |  |     |     |

|        |   |                                                  |    |      |       |       |  |     |     |
|--------|---|--------------------------------------------------|----|------|-------|-------|--|-----|-----|
| 9308   |   |                                                  |    |      |       |       |  | -17 | -15 |
| GO:000 | P | serine family amino acid metabolic process       | 17 | 54   | 4.60E | 4.30E |  |     |     |
| 9069   |   |                                                  |    |      |       |       |  | -17 | -15 |
| GO:000 | P | sulfur metabolic process                         | 27 | 220  | 5.20E | 4.70E |  |     |     |
| 6790   |   |                                                  |    |      |       |       |  | -17 | -15 |
| GO:001 | P | hexose metabolic process                         | 22 | 126  | 5.80E | 5.10E |  |     |     |
| 9318   |   |                                                  |    |      |       |       |  | -17 | -15 |
| GO:000 | P | cellular amino acid metabolic process            | 35 | 430  | 1.70E | 1.40E |  |     |     |
| 6520   |   |                                                  |    |      |       |       |  | -16 | -14 |
| GO:002 | P | cellular component assembly                      | 28 | 265  | 4.50E | 3.70E |  |     |     |
| 2607   |   |                                                  |    |      |       |       |  | -16 | -14 |
| GO:000 | P | organelle organization                           | 41 | 640  | 9.80E | 7.70E |  |     |     |
| 6996   |   |                                                  |    |      |       |       |  | -16 | -14 |
| GO:000 | P | catabolic process                                | 59 | 1307 | 1.70E | 1.30E |  |     |     |
| 9056   |   |                                                  |    |      |       |       |  | -15 | -13 |
| GO:000 | P | glucose metabolic process                        | 18 | 86   | 2.50E | 1.90E |  |     |     |
| 6006   |   |                                                  |    |      |       |       |  | -15 | -13 |
| GO:004 | P | carboxylic acid biosynthetic process             | 32 | 417  | 1.60E | 1.10E |  |     |     |
| 6394   |   |                                                  |    |      |       |       |  | -14 | -12 |
| GO:001 | P | organic acid biosynthetic process                | 32 | 417  | 1.60E | 1.10E |  |     |     |
| 6053   |   |                                                  |    |      |       |       |  | -14 | -12 |
| GO:000 | P | pyruvate metabolic process                       | 12 | 25   | 3.40E | 2.30E |  |     |     |
| 6090   |   |                                                  |    |      |       |       |  | -14 | -12 |
| GO:001 | P | carbohydrate catabolic process                   | 19 | 128  | 1.10E | 7.10E |  |     |     |
| 6052   |   |                                                  |    |      |       |       |  | -13 | -12 |
| GO:000 | P | cellular amino acid derivative metabolic process | 27 | 315  | 1.60E | 1.00E |  |     |     |



|            |   |                                                 |     |      |       |       |  |     |     |
|------------|---|-------------------------------------------------|-----|------|-------|-------|--|-----|-----|
| 6575       |   |                                                 |     |      |       |       |  | -13 | -11 |
| GO:0000096 | P | sulfur amino acid metabolic process             | 16  | 84   | 3.20E | 2.00E |  | -13 | -11 |
| GO:0022613 | P | ribonucleoprotein complex biogenesis            | 24  | 253  | 5.00E | 3.00E |  | -13 | -11 |
| GO:0022618 | P | ribonucleoprotein complex assembly              | 10  | 16   | 6.40E | 3.80E |  | -13 | -11 |
| GO:0044271 | P | cellular nitrogen compound biosynthetic process | 29  | 394  | 7.20E | 4.20E |  | -13 | -11 |
| GO:0000097 | P | sulfur amino acid biosynthetic process          | 13  | 49   | 1.50E | 8.20E |  | -12 | -11 |
| GO:0044272 | P | sulfur compound biosynthetic process            | 17  | 115  | 2.30E | 1.30E |  | -12 | -10 |
| GO:0008652 | P | cellular amino acid biosynthetic process        | 21  | 202  | 2.90E | 1.60E |  | -12 | -10 |
| GO:0009070 | P | serine family amino acid biosynthetic process   | 11  | 29   | 3.10E | 1.60E |  | -12 | -10 |
| GO:0009309 | P | amine biosynthetic process                      | 22  | 229  | 3.70E | 1.90E |  | -12 | -10 |
| GO:0009058 | P | biosynthetic process                            | 127 | 5118 | 3.90E | 2.00E |  | -12 | -10 |
| GO:0019748 | P | secondary metabolic process                     | 31  | 489  | 4.40E | 2.20E |  | -12 | -10 |
| GO:0006725 | P | cellular aromatic compound metabolic process    | 28  | 399  | 5.20E | 2.50E |  | -12 | -10 |
| GO:004     | P | cellular carbohydrate catabolic process         | 17  | 125  | 7.50E | 3.60E |  |     |     |

|        |   |                                                         |    |      |       |       |  |     |     |
|--------|---|---------------------------------------------------------|----|------|-------|-------|--|-----|-----|
| 4275   |   |                                                         |    |      |       |       |  | -12 | -10 |
| GO:003 | P | monocarboxylic acid metabolic process                   | 28 | 408  | 8.50E | 4.00E |  |     |     |
| 2787   |   |                                                         |    |      |       |       |  | -12 | -10 |
| GO:001 | P | cellular component organization                         | 49 | 1179 | 8.70E | 4.00E |  |     |     |
| 6043   |   |                                                         |    |      |       |       |  | -12 | -10 |
| GO:001 | P | cysteine biosynthetic process                           | 10 | 24   | 1.40E | 6.30E |  |     |     |
| 9344   |   |                                                         |    |      |       |       |  | -11 | -10 |
| GO:005 | P | nucleobase, nucleoside and nucleotide metabolic process | 21 | 221  | 1.40E | 6.30E |  |     |     |
| 5086   |   |                                                         |    |      |       |       |  | -11 | -10 |
| GO:000 | P | cysteine metabolic process                              | 10 | 24   | 1.40E | 6.30E |  |     |     |
| 6534   |   |                                                         |    |      |       |       |  | -11 | -10 |
| GO:001 | P | carbon fixation                                         | 9  | 16   | 1.90E | 8.20E |  |     |     |
| 5977   |   |                                                         |    |      |       |       |  | -11 | -10 |
| GO:005 | P | cofactor metabolic process                              | 24 | 308  | 2.30E | 9.90E |  |     |     |
| 1186   |   |                                                         |    |      |       |       |  | -11 | -10 |
| GO:004 | P | heterocycle metabolic process                           | 29 | 460  | 2.50E | 1.00E |  |     |     |
| 6483   |   |                                                         |    |      |       |       |  | -11 | -09 |
| GO:000 | P | cellular aldehyde metabolic process                     | 10 | 27   | 3.70E | 1.50E |  |     |     |
| 6081   |   |                                                         |    |      |       |       |  | -11 | -09 |
| GO:000 | P | glucose catabolic process                               | 14 | 83   | 4.20E | 1.70E |  |     |     |
| 6007   |   |                                                         |    |      |       |       |  | -11 | -09 |
| GO:001 | P | hexose catabolic process                                | 14 | 84   | 4.80E | 1.90E |  |     |     |
| 9320   |   |                                                         |    |      |       |       |  | -11 | -09 |
| GO:004 | P | monosaccharide catabolic process                        | 14 | 84   | 4.80E | 1.90E |  |     |     |
| 6365   |   |                                                         |    |      |       |       |  | -11 | -09 |
| GO:003 | P | cellular response to oxidative stress                   | 8  | 11   | 5.80E | 2.20E |  |     |     |

|        |   |                                                                              |    |      |       |       |     |     |
|--------|---|------------------------------------------------------------------------------|----|------|-------|-------|-----|-----|
| 4599   |   |                                                                              |    |      |       |       | -11 | -09 |
| GO:004 | P | ribosome biogenesis                                                          | 21 | 241  | 6.20E | 2.30E | -11 | -09 |
| 2254   |   |                                                                              |    |      |       |       | -11 | -09 |
| GO:004 | P | alcohol catabolic process                                                    | 14 | 89   | 9.60E | 3.50E | -11 | -09 |
| 6164   |   |                                                                              |    |      |       |       | -11 | -09 |
| GO:004 | P | cellular macromolecule catabolic process                                     | 28 | 465  | 1.50E | 5.40E | -10 | -09 |
| 4265   |   |                                                                              |    |      |       |       | -10 | -09 |
| GO:001 | P | isopentenyl diphosphate biosynthetic process, mevalonate-independent pathway | 8  | 13   | 1.50E | 5.40E | -10 | -09 |
| 9288   |   |                                                                              |    |      |       |       | -10 | -09 |
| GO:001 | P | glyceraldehyde-3-phosphate metabolic process                                 | 8  | 13   | 1.50E | 5.40E | -10 | -09 |
| 9682   |   |                                                                              |    |      |       |       | -10 | -09 |
| GO:000 | P | lipid biosynthetic process                                                   | 27 | 439  | 2.00E | 7.10E | -10 | -09 |
| 8610   |   |                                                                              |    |      |       |       | -10 | -09 |
| GO:005 | P | localization                                                                 | 62 | 1922 | 3.40E | 1.20E | -10 | -08 |
| 1179   |   |                                                                              |    |      |       |       | -10 | -08 |
| GO:005 | P | establishment of localization in cell                                        | 29 | 525  | 4.60E | 1.60E | -10 | -08 |
| 1649   |   |                                                                              |    |      |       |       | -10 | -08 |
| GO:005 | P | establishment of localization                                                | 60 | 1851 | 5.70E | 1.90E | -10 | -08 |
| 1234   |   |                                                                              |    |      |       |       | -10 | -08 |
| GO:005 | P | cellular localization                                                        | 30 | 569  | 6.60E | 2.20E | -10 | -08 |
| 1641   |   |                                                                              |    |      |       |       | -10 | -08 |
| GO:000 | P | flavonoid biosynthetic process                                               | 12 | 69   | 7.60E | 2.40E | -10 | -08 |
| 9813   |   |                                                                              |    |      |       |       | -10 | -08 |
| GO:004 | P | isopentenyl diphosphate metabolic process                                    | 8  | 17   | 7.70E | 2.40E | -10 | -08 |
| 6490   |   |                                                                              |    |      |       |       | -10 | -08 |
| GO:000 | P | isopentenyl diphosphate biosynthetic process                                 | 8  | 17   | 7.70E | 2.40E | -10 | -08 |

|        |   |                                            |     |      |       |       |  |     |     |
|--------|---|--------------------------------------------|-----|------|-------|-------|--|-----|-----|
| 9240   |   |                                            |     |      |       |       |  | -10 | -08 |
| GO:004 | P | cellular biosynthetic process              | 116 | 4925 | 1.00E | 3.20E |  |     |     |
| 4249   |   |                                            |     |      |       |       |  | -09 | -08 |
| GO:003 | P | cellular carbohydrate biosynthetic process | 17  | 177  | 1.10E | 3.30E |  |     |     |
| 4637   |   |                                            |     |      |       |       |  | -09 | -08 |
| GO:000 | P | coenzyme metabolic process                 | 17  | 188  | 2.50E | 7.50E |  |     |     |
| 6732   |   |                                            |     |      |       |       |  | -09 | -08 |
| GO:000 | P | flavonoid metabolic process                | 12  | 78   | 2.60E | 7.90E |  |     |     |
| 9812   |   |                                            |     |      |       |       |  | -09 | -08 |
| GO:001 | P | carbohydrate biosynthetic process          | 20  | 277  | 3.70E | 1.10E |  |     |     |
| 6051   |   |                                            |     |      |       |       |  | -09 | -07 |
| GO:004 | P | cellular lipid metabolic process           | 30  | 618  | 4.00E | 1.20E |  |     |     |
| 4255   |   |                                            |     |      |       |       |  | -09 | -07 |
| GO:004 | P | cellular protein metabolic process         | 89  | 3487 | 4.00E | 1.20E |  |     |     |
| 4267   |   |                                            |     |      |       |       |  | -09 | -07 |
| GO:001 | P | cellular homeostasis                       | 16  | 174  | 5.90E | 1.70E |  |     |     |
| 9725   |   |                                            |     |      |       |       |  | -09 | -07 |
| GO:004 | P | cellular polysaccharide metabolic process  | 14  | 127  | 6.40E | 1.80E |  |     |     |
| 4264   |   |                                            |     |      |       |       |  | -09 | -07 |
| GO:000 | P | polysaccharide metabolic process           | 15  | 152  | 7.30E | 2.00E |  |     |     |
| 5976   |   |                                            |     |      |       |       |  | -09 | -07 |
| GO:000 | P | nucleoside phosphate metabolic process     | 16  | 180  | 9.20E | 2.50E |  |     |     |
| 6753   |   |                                            |     |      |       |       |  | -09 | -07 |
| GO:000 | P | nucleotide metabolic process               | 16  | 180  | 9.20E | 2.50E |  |     |     |
| 9117   |   |                                            |     |      |       |       |  | -09 | -07 |
| GO:004 | P | glucan metabolic process                   | 12  | 89   | 1.00E | 2.70E |  |     |     |

|        |   |                                              |    |      |       |       |  |     |     |
|--------|---|----------------------------------------------|----|------|-------|-------|--|-----|-----|
| 4042   |   |                                              |    |      |       |       |  | -08 | -07 |
| GO:001 | P | rRNA metabolic process                       | 13 | 110  | 1.00E | 2.70E |  |     |     |
| 6072   |   |                                              |    |      |       |       |  | -08 | -07 |
| GO:000 | P | rRNA processing                              | 13 | 110  | 1.00E | 2.70E |  |     |     |
| 6364   |   |                                              |    |      |       |       |  | -08 | -07 |
| GO:000 | P | response to stress                           | 66 | 2320 | 1.20E | 3.00E |  |     |     |
| 6950   |   |                                              |    |      |       |       |  | -08 | -07 |
| GO:004 | P | homeostatic process                          | 17 | 216  | 1.70E | 4.40E |  |     |     |
| 2592   |   |                                              |    |      |       |       |  | -08 | -07 |
| GO:000 | P | protein folding                              | 19 | 275  | 1.80E | 4.50E |  |     |     |
| 6457   |   |                                              |    |      |       |       |  | -08 | -07 |
| GO:000 | P | transport                                    | 56 | 1846 | 2.10E | 5.30E |  |     |     |
| 6810   |   |                                              |    |      |       |       |  | -08 | -07 |
| GO:000 | P | lipid metabolic process                      | 34 | 841  | 2.90E | 7.30E |  |     |     |
| 6629   |   |                                              |    |      |       |       |  | -08 | -07 |
| GO:004 | P | alcohol biosynthetic process                 | 9  | 44   | 3.00E | 7.40E |  |     |     |
| 6165   |   |                                              |    |      |       |       |  | -08 | -07 |
| GO:000 | P | glutathione metabolic process                | 6  | 10   | 3.70E | 8.90E |  |     |     |
| 6749   |   |                                              |    |      |       |       |  | -08 | -07 |
| GO:003 | P | cellular response to reactive oxygen species | 6  | 10   | 3.70E | 8.90E |  |     |     |
| 4614   |   |                                              |    |      |       |       |  | -08 | -07 |
| GO:004 | P | cellular protein complex assembly            | 13 | 124  | 3.80E | 9.20E |  |     |     |
| 3623   |   |                                              |    |      |       |       |  | -08 | -07 |
| GO:003 | P | macromolecule localization                   | 24 | 462  | 4.50E | 1.10E |  |     |     |
| 3036   |   |                                              |    |      |       |       |  | -08 | -06 |
| GO:001 | P | protein metabolic process                    | 94 | 4009 | 7.50E | 1.80E |  |     |     |

|        |   |                                                     |    |     |       |       |  |     |     |
|--------|---|-----------------------------------------------------|----|-----|-------|-------|--|-----|-----|
| 9538   |   |                                                     |    |     |       |       |  | -08 | -06 |
| GO:000 | P | cellular glucan metabolic process                   | 11 | 87  | 7.60E | 1.80E |  |     |     |
| 6073   |   |                                                     |    |     |       |       |  | -08 | -06 |
| GO:000 | P | post-embryonic morphogenesis                        | 8  | 35  | 8.40E | 1.90E |  |     |     |
| 9886   |   |                                                     |    |     |       |       |  | -08 | -06 |
| GO:000 | P | protein complex assembly                            | 13 | 134 | 8.80E | 2.00E |  |     |     |
| 6461   |   |                                                     |    |     |       |       |  | -08 | -06 |
| GO:004 | P | pigment metabolic process                           | 13 | 134 | 8.80E | 2.00E |  |     |     |
| 2440   |   |                                                     |    |     |       |       |  | -08 | -06 |
| GO:007 | P | protein complex biogenesis                          | 13 | 134 | 8.80E | 2.00E |  |     |     |
| 0271   |   |                                                     |    |     |       |       |  | -08 | -06 |
| GO:000 | P | isoprenoid biosynthetic process                     | 13 | 135 | 9.50E | 2.10E |  |     |     |
| 8299   |   |                                                     |    |     |       |       |  | -08 | -06 |
| GO:004 | P | pigment biosynthetic process                        | 12 | 112 | 1.00E | 2.30E |  |     |     |
| 6148   |   |                                                     |    |     |       |       |  | -07 | -06 |
| GO:001 | P | thylakoid membrane organization                     | 7  | 23  | 1.00E | 2.30E |  |     |     |
| 0027   |   |                                                     |    |     |       |       |  | -07 | -06 |
| GO:000 | P | plastid membrane organization                       | 7  | 23  | 1.00E | 2.30E |  |     |     |
| 9668   |   |                                                     |    |     |       |       |  | -07 | -06 |
| GO:000 | P | photosynthesis, light harvesting                    | 7  | 26  | 2.10E | 4.60E |  |     |     |
| 9765   |   |                                                     |    |     |       |       |  | -07 | -06 |
| GO:004 | P | cellular amino acid derivative biosynthetic process | 16 | 233 | 2.60E | 5.40E |  |     |     |
| 2398   |   |                                                     |    |     |       |       |  | -07 | -06 |
| GO:004 | P | hydrogen peroxide metabolic process                 | 7  | 27  | 2.60E | 5.60E |  |     |     |
| 2743   |   |                                                     |    |     |       |       |  | -07 | -06 |
| GO:001 | P | aromatic compound biosynthetic process              | 16 | 237 | 3.20E | 6.60E |  |     |     |

|        |   |                                            |    |     |       |       |  |     |     |
|--------|---|--------------------------------------------|----|-----|-------|-------|--|-----|-----|
| 9438   |   |                                            |    |     |       |       |  | -07 | -06 |
| GO:000 | P | protein targeting                          | 13 | 155 | 4.20E | 8.70E |  |     |     |
| 6605   |   |                                            |    |     |       |       |  | -07 | -06 |
| GO:004 | P | intracellular transport                    | 22 | 463 | 6.80E | 1.40E |  |     |     |
| 6907   |   |                                            |    |     |       |       |  | -07 | -05 |
| GO:000 | P | peptide metabolic process                  | 7  | 32  | 7.10E | 1.50E |  |     |     |
| 6518   |   |                                            |    |     |       |       |  | -07 | -05 |
| GO:000 | P | phospholipid biosynthetic process          | 10 | 88  | 7.30E | 1.50E |  |     |     |
| 8654   |   |                                            |    |     |       |       |  | -07 | -05 |
| GO:000 | P | isoprenoid metabolic process               | 13 | 168 | 9.80E | 2.00E |  |     |     |
| 6720   |   |                                            |    |     |       |       |  | -07 | -05 |
| GO:000 | P | phenylpropanoid biosynthetic process       | 12 | 141 | 1.00E | 2.00E |  |     |     |
| 9699   |   |                                            |    |     |       |       |  | -06 | -05 |
| GO:003 | P | regulation of protein modification process | 5  | 10  | 1.10E | 2.10E |  |     |     |
| 1399   |   |                                            |    |     |       |       |  | -06 | -05 |
| GO:007 | P | cellular response to hydrogen peroxide     | 5  | 10  | 1.10E | 2.10E |  |     |     |
| 0301   |   |                                            |    |     |       |       |  | -06 | -05 |
| GO:001 | P | photosystem II assembly                    | 5  | 10  | 1.10E | 2.10E |  |     |     |
| 0207   |   |                                            |    |     |       |       |  | -06 | -05 |
| GO:000 | P | response to biotic stimulus                | 26 | 638 | 1.10E | 2.10E |  |     |     |
| 9607   |   |                                            |    |     |       |       |  | -06 | -05 |
| GO:003 | P | ncRNA processing                           | 13 | 170 | 1.10E | 2.10E |  |     |     |
| 4470   |   |                                            |    |     |       |       |  | -06 | -05 |
| GO:000 | P | plastid organization                       | 11 | 119 | 1.30E | 2.60E |  |     |     |
| 9657   |   |                                            |    |     |       |       |  | -06 | -05 |
| GO:000 | P | protein localization                       | 20 | 408 | 1.40E | 2.60E |  |     |     |

|        |   |                                       |    |     |       |       |  |     |     |
|--------|---|---------------------------------------|----|-----|-------|-------|--|-----|-----|
| 8104   |   |                                       |    |     |       |       |  | -06 | -05 |
| GO:000 | P | glycine metabolic process             | 6  | 22  | 1.50E | 2.80E |  |     |     |
| 6544   |   |                                       |    |     |       |       |  | -06 | -05 |
| GO:000 | P | phospholipid metabolic process        | 11 | 121 | 1.60E | 2.90E |  |     |     |
| 6644   |   |                                       |    |     |       |       |  | -06 | -05 |
| GO:000 | P | glucan biosynthetic process           | 8  | 54  | 1.60E | 2.90E |  |     |     |
| 9250   |   |                                       |    |     |       |       |  | -06 | -05 |
| GO:004 | P | carboxylic acid catabolic process     | 10 | 98  | 1.80E | 3.20E |  |     |     |
| 6395   |   |                                       |    |     |       |       |  | -06 | -05 |
| GO:001 | P | organic acid catabolic process        | 10 | 98  | 1.80E | 3.20E |  |     |     |
| 6054   |   |                                       |    |     |       |       |  | -06 | -05 |
| GO:004 | P | establishment of protein localization | 19 | 381 | 2.00E | 3.60E |  |     |     |
| 5184   |   |                                       |    |     |       |       |  | -06 | -05 |
| GO:001 | P | protein transport                     | 19 | 381 | 2.00E | 3.60E |  |     |     |
| 5031   |   |                                       |    |     |       |       |  | -06 | -05 |
| GO:000 | P | macromolecule catabolic process       | 33 | 982 | 2.50E | 4.40E |  |     |     |
| 9057   |   |                                       |    |     |       |       |  | -06 | -05 |
| GO:001 | P | organophosphate metabolic process     | 11 | 130 | 3.00E | 5.30E |  |     |     |
| 9637   |   |                                       |    |     |       |       |  | -06 | -05 |
| GO:005 | P | response to protein stimulus          | 5  | 14  | 3.90E | 6.80E |  |     |     |
| 1789   |   |                                       |    |     |       |       |  | -06 | -05 |
| GO:000 | P | pentose-phosphate shunt               | 6  | 28  | 5.00E | 8.70E |  |     |     |
| 6098   |   |                                       |    |     |       |       |  | -06 | -05 |
| GO:001 | P | proteasomal protein catabolic process | 5  | 15  | 5.20E | 8.90E |  |     |     |
| 0498   |   |                                       |    |     |       |       |  | -06 | -05 |
| GO:004 | P | cellular amide metabolic process      | 7  | 45  | 5.40E | 9.20E |  |     |     |



|        |   |                                                      |     |      |       |       |  |     |     |
|--------|---|------------------------------------------------------|-----|------|-------|-------|--|-----|-----|
| 3603   |   |                                                      |     |      |       |       |  | -06 | -05 |
| GO:000 | P | NADPH regeneration                                   | 6   | 29   | 6.00E | 0.000 |  |     |     |
| 6740   |   |                                                      |     |      |       |       |  | -06 | 1   |
| GO:000 | P | oxygen and reactive oxygen species metabolic process | 8   | 66   | 6.10E | 0.000 |  |     |     |
| 6800   |   |                                                      |     |      |       |       |  | -06 | 1   |
| GO:000 | P | phenylpropanoid metabolic process                    | 12  | 175  | 8.10E | 0.000 |  |     |     |
| 9698   |   |                                                      |     |      |       |       |  | -06 | 14  |
| GO:000 | P | intracellular protein transport                      | 16  | 311  | 8.80E | 0.000 |  |     |     |
| 6886   |   |                                                      |     |      |       |       |  | -06 | 15  |
| GO:000 | P | amine catabolic process                              | 7   | 49   | 8.90E | 0.000 |  |     |     |
| 9310   |   |                                                      |     |      |       |       |  | -06 | 15  |
| GO:004 | P | cellular macromolecule metabolic process             | 125 | 6447 | 9.10E | 0.000 |  |     |     |
| 4260   |   |                                                      |     |      |       |       |  | -06 | 15  |
| GO:000 | P | NADP metabolic process                               | 6   | 32   | 9.90E | 0.000 |  |     |     |
| 6739   |   |                                                      |     |      |       |       |  | -06 | 16  |
| GO:004 | P | cell redox homeostasis                               | 8   | 72   | 1.10E | 0.000 |  |     |     |
| 5454   |   |                                                      |     |      |       |       |  | -05 | 18  |
| GO:003 | P | cellular protein localization                        | 16  | 322  | 1.30E | 0.000 |  |     |     |
| 4613   |   |                                                      |     |      |       |       |  | -05 | 21  |
| GO:000 | P | polysaccharide catabolic process                     | 5   | 19   | 1.40E | 0.000 |  |     |     |
| 0272   |   |                                                      |     |      |       |       |  | -05 | 22  |
| GO:001 | P | starch biosynthetic process                          | 5   | 19   | 1.40E | 0.000 |  |     |     |
| 9252   |   |                                                      |     |      |       |       |  | -05 | 22  |
| GO:003 | P | cellular response to stress                          | 18  | 399  | 1.40E | 0.000 |  |     |     |
| 3554   |   |                                                      |     |      |       |       |  | -05 | 22  |
| GO:004 | P | response to hydrogen peroxide                        | 7   | 53   | 1.40E | 0.000 |  |     |     |

|        |   |                                                     |    |      |       |       |  |     |    |
|--------|---|-----------------------------------------------------|----|------|-------|-------|--|-----|----|
| 2542   |   |                                                     |    |      |       |       |  | -05 | 22 |
| GO:000 | P | toxin metabolic process                             | 7  | 53   | 1.40E | 0.000 |  |     |    |
| 9404   |   |                                                     |    |      |       |       |  | -05 | 22 |
| GO:000 | P | toxin catabolic process                             | 7  | 53   | 1.40E | 0.000 |  |     |    |
| 9407   |   |                                                     |    |      |       |       |  | -05 | 22 |
| GO:000 | P | fatty acid metabolic process                        | 13 | 225  | 1.90E | 0.000 |  |     |    |
| 6631   |   |                                                     |    |      |       |       |  | -05 | 3  |
| GO:007 | P | divalent metal ion transport                        | 5  | 21   | 2.10E | 0.000 |  |     |    |
| 0838   |   |                                                     |    |      |       |       |  | -05 | 31 |
| GO:005 | P | organelle localization                              | 5  | 21   | 2.10E | 0.000 |  |     |    |
| 1640   |   |                                                     |    |      |       |       |  | -05 | 31 |
| GO:004 | P | heterocycle catabolic process                       | 6  | 38   | 2.40E | 0.000 |  |     |    |
| 6700   |   |                                                     |    |      |       |       |  | -05 | 36 |
| GO:000 | P | oxidoreduction coenzyme metabolic process           | 7  | 58   | 2.40E | 0.000 |  |     |    |
| 6733   |   |                                                     |    |      |       |       |  | -05 | 36 |
| GO:004 | P | positive regulation of transcription, DNA-dependent | 5  | 22   | 2.50E | 0.000 |  |     |    |
| 5893   |   |                                                     |    |      |       |       |  | -05 | 37 |
| GO:007 | P | cellular macromolecule localization                 | 16 | 341  | 2.60E | 0.000 |  |     |    |
| 0727   |   |                                                     |    |      |       |       |  | -05 | 38 |
| GO:000 | P | nitrogen compound metabolic process                 | 81 | 3826 | 3.00E | 0.000 |  |     |    |
| 6807   |   |                                                     |    |      |       |       |  | -05 | 44 |
| GO:005 | P | positive regulation of RNA metabolic process        | 5  | 23   | 3.00E | 0.000 |  |     |    |
| 1254   |   |                                                     |    |      |       |       |  | -05 | 44 |
| GO:003 | P | response to endoplasmic reticulum stress            | 5  | 23   | 3.00E | 0.000 |  |     |    |
| 4976   |   |                                                     |    |      |       |       |  | -05 | 44 |
| GO:003 | P | cellular cation homeostasis                         | 8  | 84   | 3.10E | 0.000 |  |     |    |

|        |   |                                               |   |     |       |       |  |     |    |
|--------|---|-----------------------------------------------|---|-----|-------|-------|--|-----|----|
| 0003   |   |                                               |   |     |       |       |  | -05 | 44 |
| GO:000 | P | response to reactive oxygen species           | 8 | 85  | 3.30E | 0.000 |  |     |    |
| 0302   |   |                                               |   |     |       |       |  | -05 | 48 |
| GO:001 | P | pentose metabolic process                     | 6 | 41  | 3.50E | 0.000 |  |     |    |
| 9321   |   |                                               |   |     |       |       |  | -05 | 49 |
| GO:004 | P | nicotinamide nucleotide metabolic process     | 6 | 41  | 3.50E | 0.000 |  |     |    |
| 6496   |   |                                               |   |     |       |       |  | -05 | 49 |
| GO:000 | P | starch metabolic process                      | 6 | 41  | 3.50E | 0.000 |  |     |    |
| 5982   |   |                                               |   |     |       |       |  | -05 | 49 |
| GO:000 | P | nicotinamide metabolic process                | 6 | 41  | 3.50E | 0.000 |  |     |    |
| 6769   |   |                                               |   |     |       |       |  | -05 | 49 |
| GO:000 | P | cellular biogenic amine metabolic process     | 7 | 62  | 3.60E | 0.000 |  |     |    |
| 6576   |   |                                               |   |     |       |       |  | -05 | 5  |
| GO:000 | P | glutamine family amino acid metabolic process | 6 | 42  | 3.90E | 0.000 |  |     |    |
| 9064   |   |                                               |   |     |       |       |  | -05 | 54 |
| GO:001 | P | cellular membrane organization                | 9 | 114 | 3.90E | 0.000 |  |     |    |
| 6044   |   |                                               |   |     |       |       |  | -05 | 54 |
| GO:002 | P | electron transport chain                      | 8 | 88  | 4.20E | 0.000 |  |     |    |
| 2900   |   |                                               |   |     |       |       |  | -05 | 57 |
| GO:005 | P | cation homeostasis                            | 8 | 90  | 4.80E | 0.000 |  |     |    |
| 5080   |   |                                               |   |     |       |       |  | -05 | 66 |
| GO:004 | P | cell wall macromolecule metabolic process     | 6 | 45  | 5.60E | 0.000 |  |     |    |
| 4036   |   |                                               |   |     |       |       |  | -05 | 76 |
| GO:003 | P | cellular polysaccharide biosynthetic process  | 8 | 92  | 5.60E | 0.000 |  |     |    |
| 3692   |   |                                               |   |     |       |       |  | -05 | 76 |
| GO:000 | P | aromatic amino acid family metabolic process  | 7 | 68  | 6.10E | 0.000 |  |     |    |

|        |   |                                                  |     |      |       |       |  |     |    |
|--------|---|--------------------------------------------------|-----|------|-------|-------|--|-----|----|
| 9072   |   |                                                  |     |      |       |       |  | -05 | 82 |
| GO:001 | P | pyridine nucleotide metabolic process            | 6   | 46   | 6.20E | 0.000 |  |     |    |
| 9362   |   |                                                  |     |      |       |       |  | -05 | 83 |
| GO:000 | P | protein modification process                     | 39  | 1474 | 6.40E | 0.000 |  |     |    |
| 6464   |   |                                                  |     |      |       |       |  | -05 | 84 |
| GO:003 | P | ncRNA metabolic process                          | 13  | 254  | 6.30E | 0.000 |  |     |    |
| 4660   |   |                                                  |     |      |       |       |  | -05 | 84 |
| GO:000 | P | nucleotide biosynthetic process                  | 9   | 122  | 6.40E | 0.000 |  |     |    |
| 9165   |   |                                                  |     |      |       |       |  | -05 | 85 |
| GO:000 | P | cellular amino acid catabolic process            | 6   | 47   | 7.00E | 0.000 |  |     |    |
| 9063   |   |                                                  |     |      |       |       |  | -05 | 9  |
| GO:003 | P | regulation of cellular protein metabolic process | 6   | 47   | 7.00E | 0.000 |  |     |    |
| 2268   |   |                                                  |     |      |       |       |  | -05 | 9  |
| GO:000 | P | cellular ion homeostasis                         | 8   | 96   | 7.40E | 0.000 |  |     |    |
| 6873   |   |                                                  |     |      |       |       |  | -05 | 96 |
| GO:005 | P | cellular chemical homeostasis                    | 8   | 97   | 7.90E | 0.001 |  |     |    |
| 5082   |   |                                                  |     |      |       |       |  | -05 |    |
| GO:005 | P | cofactor biosynthetic process                    | 11  | 191  | 8.60E | 0.001 |  |     |    |
| 1188   |   |                                                  |     |      |       |       |  | -05 | 1  |
| GO:000 | P | nucleoside metabolic process                     | 6   | 50   | 9.50E | 0.001 |  |     |    |
| 9116   |   |                                                  |     |      |       |       |  | -05 | 2  |
| GO:004 | P | macromolecule metabolic process                  | 130 | 7127 | 0.000 | 0.001 |  |     |    |
| 3170   |   |                                                  |     |      |       |       |  | 1   | 3  |
| GO:000 | P | positive regulation of biosynthetic process      | 7   | 76   | 0.000 | 0.001 |  |     |    |
| 9891   |   |                                                  |     |      |       |       |  | 12  | 4  |
| GO:000 | P | oligosaccharide metabolic process                | 6   | 52   | 0.000 | 0.001 |  |     |    |

|        |   |                                                      |    |     |       |       |   |
|--------|---|------------------------------------------------------|----|-----|-------|-------|---|
| 9311   |   |                                                      |    |     |       | 12    | 4 |
| GO:001 | P | regulation of phosphate metabolic process            | 6  | 52  | 0.000 | 0.001 |   |
| 9220   |   |                                                      |    |     | 12    | 4     |   |
| GO:005 | P | regulation of phosphorus metabolic process           | 6  | 52  | 0.000 | 0.001 |   |
| 1174   |   |                                                      |    |     | 12    | 4     |   |
| GO:005 | P | ion homeostasis                                      | 8  | 103 | 0.000 | 0.001 |   |
| 0801   |   |                                                      |    |     | 12    | 4     |   |
| GO:003 | P | positive regulation of cellular biosynthetic process | 7  | 76  | 0.000 | 0.001 |   |
| 1328   |   |                                                      |    |     | 12    | 4     |   |
| GO:003 | P | oxylipin biosynthetic process                        | 5  | 32  | 0.000 | 0.001 |   |
| 1408   |   |                                                      |    |     | 12    | 5     |   |
| GO:005 | P | regulation of protein metabolic process              | 6  | 54  | 0.000 | 0.001 |   |
| 1246   |   |                                                      |    |     | 14    | 7     |   |
| GO:005 | P | oxidation reduction                                  | 11 | 203 | 0.000 | 0.001 |   |
| 5114   |   |                                                      |    |     | 14    | 7     |   |
| GO:006 | P | regulation of biological quality                     | 22 | 665 | 0.000 | 0.001 |   |
| 5008   |   |                                                      |    |     | 14    | 7     |   |
| GO:000 | P | defense response                                     | 24 | 766 | 0.000 | 0.001 |   |
| 6952   |   |                                                      |    |     | 16    | 9     |   |
| GO:000 | P | fatty acid biosynthetic process                      | 9  | 140 | 0.000 | 0.002 |   |
| 6633   |   |                                                      |    |     | 17    | 1     |   |
| GO:000 | P | ribonucleoside metabolic process                     | 5  | 35  | 0.000 | 0.002 |   |
| 9119   |   |                                                      |    |     | 18    | 1     |   |
| GO:005 | P | regulation of catalytic activity                     | 9  | 141 | 0.000 | 0.002 |   |
| 0790   |   |                                                      |    |     | 18    | 1     |   |
| GO:000 | P | glycolysis                                           | 6  | 57  | 0.000 | 0.002 |   |

|        |   |                                                         |    |     |       |       |
|--------|---|---------------------------------------------------------|----|-----|-------|-------|
| 6096   |   |                                                         |    |     | 18    | 2     |
| GO:000 | P | alkaloid metabolic process                              | 6  | 57  | 0.000 | 0.002 |
| 9820   |   |                                                         |    |     | 18    | 2     |
| GO:000 | P | polysaccharide biosynthetic process                     | 8  | 112 | 0.000 | 0.002 |
| 0271   |   |                                                         |    |     | 2     | 3     |
| GO:000 | P | RNA processing                                          | 17 | 453 | 0.000 | 0.002 |
| 6396   |   |                                                         |    |     | 2     | 3     |
| GO:001 | P | proton transport                                        | 6  | 59  | 0.000 | 0.002 |
| 5992   |   |                                                         |    |     | 22    | 5     |
| GO:000 | P | hydrogen transport                                      | 6  | 59  | 0.000 | 0.002 |
| 6818   |   |                                                         |    |     | 22    | 5     |
| GO:003 | P | ion transmembrane transport                             | 6  | 59  | 0.000 | 0.002 |
| 4220   |   |                                                         |    |     | 22    | 5     |
| GO:001 | P | lipid catabolic process                                 | 7  | 85  | 0.000 | 0.002 |
| 6042   |   |                                                         |    |     | 22    | 5     |
| GO:000 | P | response to oxidative stress                            | 14 | 332 | 0.000 | 0.002 |
| 6979   |   |                                                         |    |     | 24    | 7     |
| GO:000 | P | purine ribonucleoside triphosphate biosynthetic process | 6  | 60  | 0.000 | 0.002 |
| 9206   |   |                                                         |    |     | 24    | 7     |
| GO:000 | P | ribonucleoside triphosphate biosynthetic process        | 6  | 60  | 0.000 | 0.002 |
| 9201   |   |                                                         |    |     | 24    | 7     |
| GO:005 | P | cellular response to stimulus                           | 25 | 840 | 0.000 | 0.002 |
| 1716   |   |                                                         |    |     | 25    | 8     |
| GO:000 | P | ribonucleoside triphosphate metabolic process           | 6  | 61  | 0.000 | 0.002 |
| 9199   |   |                                                         |    |     | 26    | 9     |
| GO:000 | P | purine ribonucleoside triphosphate metabolic process    | 6  | 61  | 0.000 | 0.002 |

|        |   |                                                     |    |     |  |  |       |       |
|--------|---|-----------------------------------------------------|----|-----|--|--|-------|-------|
| 9205   |   |                                                     |    |     |  |  | 26    | 9     |
| GO:003 |   |                                                     |    |     |  |  | 0.000 | 0.003 |
| 1407   | P | oxylipin metabolic process                          | 5  | 39  |  |  | 28    | 1     |
| GO:000 |   |                                                     |    |     |  |  | 0.000 | 0.003 |
| 9145   | P | purine nucleoside triphosphate biosynthetic process | 6  | 62  |  |  | 28    | 1     |
| GO:000 |   |                                                     |    |     |  |  | 0.000 | 0.003 |
| 9260   | P | ribonucleotide biosynthetic process                 | 7  | 89  |  |  | 29    | 2     |
| GO:000 |   |                                                     |    |     |  |  | 0.000 | 0.003 |
| 9142   | P | nucleoside triphosphate biosynthetic process        | 6  | 63  |  |  | 3     | 3     |
| GO:000 |   |                                                     |    |     |  |  | 0.000 | 0.003 |
| 9144   | P | purine nucleoside triphosphate metabolic process    | 6  | 63  |  |  | 3     | 3     |
| GO:000 |   |                                                     |    |     |  |  | 0.000 | 0.003 |
| 6164   | P | purine nucleotide biosynthetic process              | 7  | 90  |  |  | 31    | 3     |
| GO:000 |   |                                                     |    |     |  |  | 0.000 | 0.003 |
| 6811   | P | ion transport                                       | 16 | 427 |  |  | 31    | 3     |
| GO:006 |   |                                                     |    |     |  |  | 0.000 | 0.003 |
| 5009   | P | regulation of molecular function                    | 9  | 153 |  |  | 32    | 4     |
| GO:003 |   |                                                     |    |     |  |  | 0.000 | 0.003 |
| 1325   | P | positive regulation of cellular metabolic process   | 7  | 91  |  |  | 33    | 5     |
| GO:000 |   |                                                     |    |     |  |  | 0.000 | 0.003 |
| 9893   | P | positive regulation of metabolic process            | 7  | 92  |  |  | 35    | 7     |
| GO:000 |   |                                                     |    |     |  |  | 0.000 | 0.003 |
| 6163   | P | purine nucleotide metabolic process                 | 7  | 92  |  |  | 35    | 7     |
| GO:000 |   |                                                     |    |     |  |  | 0.000 | 0.003 |
| 9141   | P | nucleoside triphosphate metabolic process           | 6  | 65  |  |  | 36    | 7     |
| GO:001 |   |                                                     |    |     |  |  | 0.000 | 0.003 |
|        | P | heterocycle biosynthetic process                    | 8  | 123 |  |  |       |       |

|        |   |                                            |    |      |       |       |   |
|--------|---|--------------------------------------------|----|------|-------|-------|---|
| 8130   |   |                                            |    |      |       | 36    | 8 |
| GO:001 | P | di-, tri-valent inorganic cation transport | 5  | 43   | 0.000 | 0.004 |   |
| 5674   |   |                                            |    |      | 42    | 4     |   |
| GO:001 | P | vesicle-mediated transport                 | 12 | 272  | 0.000 | 0.004 |   |
| 6192   |   |                                            |    |      | 44    | 6     |   |
| GO:000 | P | ribonucleotide metabolic process           | 7  | 96   | 0.000 | 0.004 |   |
| 9259   |   |                                            |    |      | 44    | 6     |   |
| GO:004 | P | macromolecule modification                 | 39 | 1636 | 0.000 | 0.005 |   |
| 3412   |   |                                            |    |      | 49    |       |   |
| GO:000 | P | carbohydrate transport                     | 5  | 45   | 0.000 | 0.005 |   |
| 8643   |   |                                            |    |      | 51    | 2     |   |
| GO:000 | P | photosynthetic electron transport chain    | 5  | 46   | 0.000 | 0.005 |   |
| 9767   |   |                                            |    |      | 56    | 7     |   |
| GO:000 | P | small GTPase mediated signal transduction  | 5  | 46   | 0.000 | 0.005 |   |
| 7264   |   |                                            |    |      | 56    | 7     |   |
| GO:004 | P | cellular metabolic compound salvage        | 6  | 73   | 0.000 | 0.006 |   |
| 3094   |   |                                            |    |      | 63    | 3     |   |
| GO:000 | P | chloroplast organization                   | 6  | 73   | 0.000 | 0.006 |   |
| 9658   |   |                                            |    |      | 63    | 3     |   |
| GO:004 | P | chemical homeostasis                       | 8  | 136  | 0.000 | 0.006 |   |
| 8878   |   |                                            |    |      | 68    | 8     |   |
| GO:001 | P | glycoside metabolic process                | 7  | 104  | 0.000 | 0.006 |   |
| 6137   |   |                                            |    |      | 7     | 9     |   |
| GO:005 | P | response to stimulus                       | 78 | 4057 | 0.000 | 0.007 |   |
| 0896   |   |                                            |    |      | 8     | 9     |   |
| GO:000 | P | chromatin organization                     | 9  | 175  | 0.000 | 0.008 |   |



|        |   |                                            |    |      |       |       |   |
|--------|---|--------------------------------------------|----|------|-------|-------|---|
| 6325   |   |                                            |    |      |       | 81    |   |
| GO:000 | P | purine ribonucleotide biosynthetic process | 6  | 77   | 0.000 | 0.008 |   |
| 9152   |   |                                            |    |      |       | 82    | 1 |
| GO:005 | P | chromosome organization                    | 10 | 216  | 0.000 | 0.008 |   |
| 1276   |   |                                            |    |      |       | 91    | 9 |
| GO:004 | P | post-translational protein modification    | 31 | 1248 | 0.000 | 0.009 |   |
| 3687   |   |                                            |    |      |       | 97    | 5 |
| GO:000 | P | purine ribonucleotide metabolic process    | 6  | 80   | 0.000 | 0.009 |   |
| 9150   |   |                                            |    |      |       | 99    | 6 |
| GO:000 | P | chromatin assembly or disassembly          | 6  | 82   | 0.001 | 0.011 |   |
| 6333   |   |                                            |    |      |       | 1     |   |
| GO:001 | P | monovalent inorganic cation transport      | 7  | 115  | 0.001 | 0.012 |   |
| 5672   |   |                                            |    |      |       | 2     |   |
| GO:000 | P | nucleosome assembly                        | 5  | 56   | 0.001 | 0.012 |   |
| 6334   |   |                                            |    |      |       | 3     |   |
| GO:003 | P | nucleosome organization                    | 5  | 56   | 0.001 | 0.012 |   |
| 4728   |   |                                            |    |      |       | 3     |   |
| GO:001 | P | protein import                             | 6  | 86   | 0.001 | 0.013 |   |
| 7038   |   |                                            |    |      |       | 4     |   |
| GO:000 | P | ATP biosynthetic process                   | 5  | 58   | 0.001 | 0.014 |   |
| 6754   |   |                                            |    |      |       | 5     |   |
| GO:004 | P | ATP metabolic process                      | 5  | 59   | 0.001 | 0.015 |   |
| 6034   |   |                                            |    |      |       | 6     |   |
| GO:000 | P | porphyrin metabolic process                | 6  | 89   | 0.001 | 0.016 |   |
| 6778   |   |                                            |    |      |       | 7     |   |
| GO:003 | P | chromatin assembly                         | 5  | 60   | 0.001 | 0.016 |   |

|            |   |                                        |    |     |        |       |  |
|------------|---|----------------------------------------|----|-----|--------|-------|--|
| 1497       |   |                                        |    |     |        | 7     |  |
| GO:0065004 | P | protein-DNA complex assembly           | 5  | 60  | 0.0017 | 0.016 |  |
| GO:0010035 | P | response to inorganic substance        | 11 | 279 | 0.0018 | 0.017 |  |
| GO:0033013 | P | tetrapyrrole metabolic process         | 6  | 93  | 0.002  | 0.019 |  |
| GO:0009314 | P | response to radiation                  | 18 | 613 | 0.0021 | 0.019 |  |
| GO:0010628 | P | positive regulation of gene expression | 5  | 63  | 0.0021 | 0.019 |  |
| GO:0045941 | P | positive regulation of transcription   | 5  | 63  | 0.0021 | 0.019 |  |
| GO:0055085 | P | transmembrane transport                | 10 | 244 | 0.0022 | 0.02  |  |
| GO:0006323 | P | DNA packaging                          | 5  | 64  | 0.0022 | 0.02  |  |
| GO:0006779 | P | porphyrin biosynthetic process         | 5  | 65  | 0.0023 | 0.021 |  |
| GO:0015994 | P | chlorophyll metabolic process          | 5  | 66  | 0.0025 | 0.022 |  |
| GO:0043413 | P | macromolecule glycosylation            | 5  | 66  | 0.0025 | 0.022 |  |
| GO:0006486 | P | protein amino acid glycosylation       | 5  | 66  | 0.0025 | 0.022 |  |
| GO:007     | P | glycosylation                          | 5  | 66  | 0.002  | 0.022 |  |

|        |   |                                                                                              |    |     |       |       |   |  |
|--------|---|----------------------------------------------------------------------------------------------|----|-----|-------|-------|---|--|
| 0085   |   |                                                                                              |    |     |       |       | 5 |  |
| GO:000 | P | glycoprotein biosynthetic process                                                            | 5  | 66  | 0.002 | 0.022 |   |  |
| 9101   |   |                                                                                              |    |     | 5     |       |   |  |
| GO:001 | P | positive regulation of macromolecule biosynthetic process                                    | 5  | 69  | 0.003 | 0.026 |   |  |
| 0557   |   |                                                                                              |    |     |       |       |   |  |
| GO:004 | P | positive regulation of nucleobase, nucleoside, nucleotide and nucleic acid metabolic process | 5  | 69  | 0.003 | 0.026 |   |  |
| 5935   |   |                                                                                              |    |     |       |       |   |  |
| GO:005 | P | positive regulation of nitrogen compound metabolic process                                   | 5  | 70  | 0.003 | 0.028 |   |  |
| 1173   |   |                                                                                              |    |     | 2     |       |   |  |
| GO:003 | P | tetrapyrrole biosynthetic process                                                            | 5  | 72  | 0.003 | 0.031 |   |  |
| 3014   |   |                                                                                              |    |     | 6     |       |   |  |
| GO:000 | P | response to light stimulus                                                                   | 17 | 596 | 0.003 | 0.031 |   |  |
| 9416   |   |                                                                                              |    |     | 6     |       |   |  |
| GO:000 | P | glycoprotein metabolic process                                                               | 5  | 73  | 0.003 | 0.033 |   |  |
| 9100   |   |                                                                                              |    |     | 8     |       |   |  |
| GO:005 | P | proteolysis involved in cellular protein catabolic process                                   | 11 | 309 | 0.003 | 0.033 |   |  |
| 1603   |   |                                                                                              |    |     | 8     |       |   |  |
| GO:007 | P | cellular response to chemical stimulus                                                       | 14 | 452 | 0.004 | 0.034 |   |  |
| 0887   |   |                                                                                              |    |     |       |       |   |  |
| GO:000 | P | cation transport                                                                             | 12 | 357 | 0.004 | 0.034 |   |  |
| 6812   |   |                                                                                              |    |     |       |       |   |  |
| GO:004 | P | cellular lipid catabolic process                                                             | 5  | 74  | 0.004 | 0.034 |   |  |
| 4242   |   |                                                                                              |    |     |       |       |   |  |
| GO:005 | P | defense response to fungus                                                                   | 6  | 108 | 0.004 | 0.035 |   |  |
| 0832   |   |                                                                                              |    |     | 1     |       |   |  |
| GO:004 | P | cellular protein catabolic process                                                           | 11 | 315 | 0.004 | 0.037 |   |  |

|        |   |                                                        |     |       |       |       |   |  |
|--------|---|--------------------------------------------------------|-----|-------|-------|-------|---|--|
| 4257   |   |                                                        |     |       |       |       | 4 |  |
| GO:000 | P | protein amino acid dephosphorylation                   | 5   | 76    | 0.004 | 0.037 |   |  |
| 6470   |   |                                                        |     |       | 4     |       |   |  |
| GO:001 | P | positive regulation of macromolecule metabolic process | 5   | 76    | 0.004 | 0.037 |   |  |
| 0604   |   |                                                        |     |       | 4     |       |   |  |
| GO:001 | P | root morphogenesis                                     | 6   | 114   | 0.005 | 0.044 |   |  |
| 0015   |   |                                                        |     |       | 3     |       |   |  |
| GO:000 | P | microtubule-based process                              | 6   | 114   | 0.005 | 0.044 |   |  |
| 7017   |   |                                                        |     |       | 3     |       |   |  |
| GO:003 | P | protein localization in organelle                      | 5   | 80    | 0.005 | 0.045 |   |  |
| 3365   |   |                                                        |     |       | 4     |       |   |  |
| GO:000 | F | catalytic activity                                     | 291 | 9638  | 8.80E | 5.90E |   |  |
| 3824   |   |                                                        |     |       | -52   | -49   |   |  |
| GO:001 | F | oxidoreductase activity                                | 103 | 1463  | 2.50E | 8.30E |   |  |
| 6491   |   |                                                        |     |       | -42   | -40   |   |  |
| GO:004 | F | metal ion binding                                      | 109 | 1997  | 2.40E | 5.50E |   |  |
| 6872   |   |                                                        |     |       | -35   | -33   |   |  |
| GO:004 | F | ion binding                                            | 109 | 2087  | 9.90E | 1.30E |   |  |
| 3167   |   |                                                        |     |       | -34   | -31   |   |  |
| GO:004 | F | cation binding                                         | 109 | 2087  | 9.90E | 1.30E |   |  |
| 3169   |   |                                                        |     |       | -34   | -31   |   |  |
| GO:004 | F | tetrapyrrole binding                                   | 27  | 136   | 8.60E | 9.60E |   |  |
| 6906   |   |                                                        |     |       | -22   | -20   |   |  |
| GO:000 | F | binding                                                | 239 | 11258 | 1.70E | 1.60E |   |  |
| 5488   |   |                                                        |     |       | -16   | -14   |   |  |
| GO:000 | F | iron ion binding                                       | 22  | 161   | 5.70E | 4.20E |   |  |

|        |   |                                            |  |    |      |  |  |       |       |
|--------|---|--------------------------------------------|--|----|------|--|--|-------|-------|
| 5506   |   |                                            |  |    |      |  |  | -15   | -13   |
| GO:004 |   |                                            |  |    |      |  |  | 5.10E | 4.20E |
| 8037   | F | cofactor binding                           |  | 26 | 246  |  |  | -15   | -13   |
| GO:001 |   |                                            |  |    |      |  |  | 2.60E | 1.70E |
| 9842   | F | vitamin binding                            |  | 14 | 54   |  |  | -13   | -11   |
| GO:001 |   |                                            |  |    |      |  |  | 1.90E | 1.10E |
| 6168   | F | chlorophyll binding                        |  | 12 | 38   |  |  | -12   | -10   |
| GO:007 |   |                                            |  |    |      |  |  | 4.00E | 2.10E |
| 0279   | F | vitamin B6 binding                         |  | 12 | 41   |  |  | -12   | -10   |
| GO:003 |   |                                            |  |    |      |  |  | 4.00E | 2.10E |
| 0170   | F | pyridoxal phosphate binding                |  | 12 | 41   |  |  | -12   | -10   |
| GO:000 |   |                                            |  |    |      |  |  | 8.10E | 3.90E |
| 0166   | F | nucleotide binding                         |  | 73 | 2267 |  |  | -12   | -10   |
| GO:001 |   |                                            |  |    |      |  |  | 1.10E | 4.80E |
| 7076   | F | purine nucleotide binding                  |  | 61 | 1713 |  |  | -11   | -10   |
| GO:002 |   |                                            |  |    |      |  |  | 2.50E | 1.10E |
| 0037   | F | heme binding                               |  | 15 | 97   |  |  | -11   | -09   |
| GO:003 |   |                                            |  |    |      |  |  | 3.90E | 1.40E |
| 2555   | F | purine ribonucleotide binding              |  | 58 | 1631 |  |  | -11   | -09   |
| GO:003 |   |                                            |  |    |      |  |  | 3.90E | 1.40E |
| 2553   | F | ribonucleotide binding                     |  | 58 | 1631 |  |  | -11   | -09   |
| GO:004 |   |                                            |  |    |      |  |  | 6.30E | 2.20E |
| 6914   | F | transition metal ion binding               |  | 55 | 1618 |  |  | -10   | -08   |
| GO:001 |   |                                            |  |    |      |  |  | 6.90E | 2.30E |
| 6984   | F | ribulose-bisphosphate carboxylase activity |  | 7  | 9    |  |  | -10   | -08   |
| GO:001 |   |                                            |  |    |      |  |  | 3.90E | 1.20E |
|        | F | carboxy-lyase activity                     |  | 12 | 81   |  |  |       |       |

|        |   |                                  |    |      |       |       |     |     |
|--------|---|----------------------------------|----|------|-------|-------|-----|-----|
| 6831   |   |                                  |    |      |       |       | -09 | -07 |
| GO:005 | F | iron-sulfur cluster binding      | 9  | 37   | 8.10E | 2.30E | -09 | -07 |
| 1536   |   |                                  |    |      |       |       | -09 | -07 |
| GO:005 | F | metal cluster binding            | 9  | 37   | 8.10E | 2.30E | -09 | -07 |
| 1540   |   |                                  |    |      |       |       | -09 | -07 |
| GO:000 | F | purine nucleoside binding        | 49 | 1465 | 9.50E | 2.50E | -09 | -07 |
| 1883   |   |                                  |    |      |       |       | -09 | -07 |
| GO:000 | F | nucleoside binding               | 49 | 1465 | 9.50E | 2.50E | -09 | -07 |
| 1882   |   |                                  |    |      |       |       | -09 | -07 |
| GO:003 | F | adenyl nucleotide binding        | 49 | 1465 | 9.50E | 2.50E | -09 | -07 |
| 0554   |   |                                  |    |      |       |       | -09 | -07 |
| GO:000 | F | structural molecule activity     | 30 | 659  | 1.60E | 4.00E | -08 | -07 |
| 5198   |   |                                  |    |      |       |       | -08 | -07 |
| GO:003 | F | UDP-glucosyltransferase activity | 12 | 94   | 1.80E | 4.20E | -08 | -07 |
| 5251   |   |                                  |    |      |       |       | -08 | -07 |
| GO:001 | F | carbon-carbon lyase activity     | 14 | 141  | 2.20E | 5.00E | -08 | -07 |
| 6830   |   |                                  |    |      |       |       | -08 | -07 |
| GO:003 | F | adenyl ribonucleotide binding    | 46 | 1384 | 3.30E | 7.40E | -08 | -07 |
| 2559   |   |                                  |    |      |       |       | -08 | -07 |
| GO:000 | F | ATP binding                      | 44 | 1377 | 1.90E | 4.20E | -07 | -06 |
| 5524   |   |                                  |    |      |       |       | -07 | -06 |
| GO:001 | F | lyase activity                   | 22 | 430  | 2.10E | 4.40E | -07 | -06 |
| 6829   |   |                                  |    |      |       |       | -07 | -06 |
| GO:001 | F | isomerase activity               | 17 | 265  | 2.70E | 5.40E | -07 | -06 |
| 6853   |   |                                  |    |      |       |       | -07 | -06 |
| GO:000 | F | monooxygenase activity           | 12 | 127  | 3.60E | 7.10E | -07 | -06 |

|        |   |                                                                                                       |  |    |      |  |  |       |       |
|--------|---|-------------------------------------------------------------------------------------------------------|--|----|------|--|--|-------|-------|
| 4497   |   |                                                                                                       |  |    |      |  |  | -07   | -06   |
| GO:000 |   |                                                                                                       |  |    |      |  |  | 5.00E | 9.60E |
| 5509   | F | calcium ion binding                                                                                   |  | 15 | 215  |  |  | -07   | -06   |
| GO:004 |   |                                                                                                       |  |    |      |  |  | 7.00E | 1.30E |
| 6527   | F | glucosyltransferase activity                                                                          |  | 12 | 136  |  |  | -07   | -05   |
| GO:000 |   |                                                                                                       |  |    |      |  |  | 8.40E | 1.50E |
| 5507   | F | copper ion binding                                                                                    |  | 11 | 113  |  |  | -07   | -05   |
| GO:001 |   |                                                                                                       |  |    |      |  |  | 1.00E | 1.80E |
| 6705   | F | oxidoreductase activity, acting on paired donors, with incorporation or reduction of molecular oxygen |  | 14 | 198  |  |  | -06   | -05   |
| GO:001 |   |                                                                                                       |  |    |      |  |  | 1.70E | 2.90E |
| 6758   | F | transferase activity, transferring hexosyl groups                                                     |  | 18 | 340  |  |  | -06   | -05   |
| GO:000 |   |                                                                                                       |  |    |      |  |  | 1.90E | 3.20E |
| 3735   | F | structural constituent of ribosome                                                                    |  | 22 | 494  |  |  | -06   | -05   |
| GO:001 |   |                                                                                                       |  |    |      |  |  | 2.10E | 3.50E |
| 6740   | F | transferase activity                                                                                  |  | 77 | 3321 |  |  | -06   | -05   |
| GO:001 |   |                                                                                                       |  |    |      |  |  | 3.60E | 5.70E |
| 6679   | F | oxidoreductase activity, acting on diphenols and related substances as donors                         |  | 7  | 42   |  |  | -06   | -05   |
| GO:005 |   |                                                                                                       |  |    |      |  |  | 3.70E | 5.80E |
| 0662   | F | coenzyme binding                                                                                      |  | 13 | 191  |  |  | -06   | -05   |
| GO:001 |   |                                                                                                       |  |    |      |  |  | 6.00E | 9.10E |
| 6682   | F | oxidoreductase activity, acting on diphenols and related substances as donors, oxygen as acceptor     |  | 6  | 29   |  |  | -06   | -05   |
| GO:000 |   |                                                                                                       |  |    |      |  |  | 6.10E | 9.10E |
| 0287   | F | magnesium ion binding                                                                                 |  | 8  | 66   |  |  | -06   | -05   |
| GO:005 |   |                                                                                                       |  |    |      |  |  | 8.40E | 0.000 |
| 1213   | F | dioxygenase activity                                                                                  |  | 6  | 31   |  |  | -06   | 12    |
| GO:001 |   |                                                                                                       |  |    |      |  |  | 1.10E | 0.000 |
|        | F | antioxidant activity                                                                                  |  | 11 | 150  |  |  |       |       |

|        |   |                                                                             |    |     |  |  |  |       |       |
|--------|---|-----------------------------------------------------------------------------|----|-----|--|--|--|-------|-------|
| 6209   |   |                                                                             |    |     |  |  |  | -05   | 15    |
| GO:000 |   |                                                                             |    |     |  |  |  | 1.50E | 0.000 |
| 8194   | F | UDP-glycosyltransferase activity                                            | 13 | 219 |  |  |  | -05   | 21    |
| GO:001 |   |                                                                             |    |     |  |  |  | 1.70E | 0.000 |
| 6765   | F | transferase activity, transferring alkyl or aryl (other than methyl) groups | 11 | 158 |  |  |  | -05   | 23    |
| GO:003 |   |                                                                             |    |     |  |  |  | 2.00E | 0.000 |
| 1406   | F | carboxylic acid binding                                                     | 7  | 56  |  |  |  | -05   | 26    |
| GO:000 |   |                                                                             |    |     |  |  |  | 2.20E | 0.000 |
| 4364   | F | glutathione transferase activity                                            | 7  | 57  |  |  |  | -05   | 28    |
| GO:008 |   |                                                                             |    |     |  |  |  | 2.50E | 0.000 |
| 0044   | F | quercetin 7-O-glucosyltransferase activity                                  | 5  | 22  |  |  |  | -05   | 32    |
| GO:008 |   |                                                                             |    |     |  |  |  | 5.00E | 0.000 |
| 0043   | F | quercetin 3-O-glucosyltransferase activity                                  | 5  | 26  |  |  |  | -05   | 63    |
| GO:001 |   |                                                                             |    |     |  |  |  | 7.50E | 0.000 |
| 6757   | F | transferase activity, transferring glycosyl groups                          | 20 | 544 |  |  |  | -05   | 93    |
| GO:001 |   |                                                                             |    |     |  |  |  | 0.000 | 0.002 |
| 9001   | F | guanyl nucleotide binding                                                   | 12 | 249 |  |  |  | 21    | 4     |
| GO:003 |   |                                                                             |    |     |  |  |  | 0.000 | 0.002 |
| 2561   | F | guanyl ribonucleotide binding                                               | 12 | 249 |  |  |  | 21    | 4     |
| GO:000 |   |                                                                             |    |     |  |  |  | 0.000 | 0.002 |
| 5525   | F | GTP binding                                                                 | 12 | 249 |  |  |  | 21    | 4     |
| GO:001 |   |                                                                             |    |     |  |  |  | 0.000 | 0.005 |
| 6684   | F | oxidoreductase activity, acting on peroxide as acceptor                     | 8  | 127 |  |  |  | 45    | 1     |
| GO:000 |   |                                                                             |    |     |  |  |  | 0.000 | 0.005 |
| 4601   | F | peroxidase activity                                                         | 8  | 127 |  |  |  | 45    | 1     |
| GO:001 |   |                                                                             |    |     |  |  |  | 0.000 | 0.006 |
|        | F | protein disulfide oxidoreductase activity                                   | 5  | 46  |  |  |  |       |       |



|        |   |                                                                                                                                                                            |    |      |       |       |
|--------|---|----------------------------------------------------------------------------------------------------------------------------------------------------------------------------|----|------|-------|-------|
| 5035   |   |                                                                                                                                                                            |    |      | 56    | 2     |
| GO:000 |   |                                                                                                                                                                            |    |      | 0.000 | 0.006 |
| 3924   | F | GTPase activity                                                                                                                                                            | 6  | 72   | 59    | 5     |
| GO:001 |   |                                                                                                                                                                            |    |      | 0.000 | 0.009 |
| 6667   | F | oxidoreductase activity, acting on sulfur group of donors                                                                                                                  | 7  | 109  | 9     | 8     |
| GO:001 |   |                                                                                                                                                                            |    |      | 0.001 | 0.014 |
| 6709   | F | oxidoreductase activity, acting on paired donors, with incorporation or reduction of molecular oxygen, NADH or NADPH as one donor, and incorporation of one atom of oxygen | 5  | 56   | 3     |       |
| GO:001 |   |                                                                                                                                                                            |    |      | 0.001 | 0.018 |
| 6787   | F | hydrolase activity                                                                                                                                                         | 67 | 3468 | 7     |       |
| GO:001 |   |                                                                                                                                                                            |    |      | 0.001 | 0.018 |
| 5036   | F | disulfide oxidoreductase activity                                                                                                                                          | 5  | 60   | 7     |       |
| GO:000 |   |                                                                                                                                                                            |    |      | 0.002 | 0.025 |
| 4252   | F | serine-type endopeptidase activity                                                                                                                                         | 5  | 66   | 5     |       |
| GO:004 |   |                                                                                                                                                                            |    |      | 0.002 | 0.028 |
| 2625   | F | ATPase activity, coupled to transmembrane movement of ions                                                                                                                 | 5  | 68   | 8     |       |
| GO:001 |   |                                                                                                                                                                            |    |      | 0.004 | 0.042 |
| 7171   | F | serine hydrolase activity                                                                                                                                                  | 8  | 186  | 4     |       |
| GO:000 |   |                                                                                                                                                                            |    |      | 0.004 | 0.042 |
| 8483   | F | transaminase activity                                                                                                                                                      | 5  | 76   | 4     |       |
| GO:000 |   |                                                                                                                                                                            |    |      | 0.004 | 0.042 |
| 8236   | F | serine-type peptidase activity                                                                                                                                             | 8  | 186  | 4     |       |
| GO:001 |   |                                                                                                                                                                            |    |      | 0.004 | 0.044 |
| 6614   | F | oxidoreductase activity, acting on CH-OH group of donors                                                                                                                   | 8  | 188  | 7     |       |
| GO:001 |   |                                                                                                                                                                            |    |      | 0.004 | 0.044 |
| 6769   | F | transferase activity, transferring nitrogenous groups                                                                                                                      | 5  | 77   | 7     |       |
| GO:001 | C | integral to membrane                                                                                                                                                       | 99 | 395  | 6.40E | 3.10E |

|        |   |                              |     |      |  |  |       |       |
|--------|---|------------------------------|-----|------|--|--|-------|-------|
| 6021   |   |                              |     |      |  |  | -87   | -84   |
| GO:004 |   |                              |     |      |  |  | 1.10E | 2.70E |
| 4425   | C | membrane part                | 129 | 1360 |  |  | -67   | -65   |
| GO:003 |   |                              |     |      |  |  | 1.20E | 1.90E |
| 1224   | C | intrinsic to membrane        | 100 | 806  |  |  | -61   | -59   |
| GO:001 |   |                              |     |      |  |  | 3.60E | 4.40E |
| 6020   | C | membrane                     | 158 | 4068 |  |  | -35   | -33   |
| GO:000 |   |                              |     |      |  |  | 3.20E | 3.20E |
| 9579   | C | thylakoid                    | 44  | 376  |  |  | -26   | -24   |
| GO:004 |   |                              |     |      |  |  | 9.80E | 8.00E |
| 4422   | C | organelle part               | 104 | 2562 |  |  | -24   | -22   |
| GO:004 |   |                              |     |      |  |  | 3.30E | 2.30E |
| 4446   | C | intracellular organelle part | 103 | 2561 |  |  | -23   | -21   |
| GO:005 |   |                              |     |      |  |  | 5.80E | 3.20E |
| 5044   | C | symplast                     | 17  | 19   |  |  | -23   | -21   |
| GO:000 |   |                              |     |      |  |  | 5.80E | 3.20E |
| 9506   | C | plasmodesma                  | 17  | 19   |  |  | -23   | -21   |
| GO:000 |   |                              |     |      |  |  | 1.90E | 9.30E |
| 5911   | C | cell-cell junction           | 17  | 21   |  |  | -22   | -21   |
| GO:003 |   |                              |     |      |  |  | 3.00E | 1.30E |
| 4357   | C | photosynthetic membrane      | 35  | 273  |  |  | -22   | -20   |
| GO:000 |   |                              |     |      |  |  | 3.80E | 1.60E |
| 9521   | C | photosystem                  | 22  | 66   |  |  | -22   | -20   |
| GO:003 |   |                              |     |      |  |  | 5.70E | 2.10E |
| 0054   | C | cell junction                | 17  | 23   |  |  | -22   | -20   |
| GO:000 |   |                              |     |      |  |  | 4.00E | 1.40E |
|        | C | cytoplasm                    | 176 | 6822 |  |  |       |       |

|        |   |                          |     |       |       |       |  |     |     |
|--------|---|--------------------------|-----|-------|-------|-------|--|-----|-----|
| 5737   |   |                          |     |       |       |       |  | -19 | -17 |
| GO:000 | C | intracellular            | 221 | 9671  | 1.30E | 4.40E |  |     |     |
| 5622   |   |                          |     |       |       |       |  | -18 | -17 |
| GO:004 | C | intracellular part       | 213 | 9302  | 8.00E | 2.40E |  |     |     |
| 4424   |   |                          |     |       |       |       |  | -18 | -16 |
| GO:000 | C | cell                     | 294 | 15217 | 5.70E | 1.60E |  |     |     |
| 5623   |   |                          |     |       |       |       |  | -16 | -14 |
| GO:000 | C | photosystem II           | 15  | 45    | 1.60E | 4.40E |  |     |     |
| 9523   |   |                          |     |       |       |       |  | -15 | -14 |
| GO:003 | C | organelle membrane       | 46  | 842   | 4.40E | 1.10E |  |     |     |
| 1090   |   |                          |     |       |       |       |  | -15 | -13 |
| GO:003 | C | macromolecular complex   | 78  | 2180  | 7.30E | 1.80E |  |     |     |
| 2991   |   |                          |     |       |       |       |  | -15 | -13 |
| GO:004 | C | cell part                | 290 | 15217 | 9.60E | 2.20E |  |     |     |
| 4464   |   |                          |     |       |       |       |  | -15 | -13 |
| GO:000 | C | photosystem I            | 12  | 22    | 1.00E | 2.30E |  |     |     |
| 9522   |   |                          |     |       |       |       |  | -14 | -13 |
| GO:004 | C | thylakoid part           | 28  | 307   | 1.40E | 2.90E |  |     |     |
| 4436   |   |                          |     |       |       |       |  | -14 | -13 |
| GO:004 | C | plasma membrane part     | 23  | 222   | 2.90E | 5.80E |  |     |     |
| 4459   |   |                          |     |       |       |       |  | -13 | -12 |
| GO:000 | C | chloroplast thylakoid    | 25  | 290   | 1.20E | 2.30E |  |     |     |
| 9534   |   |                          |     |       |       |       |  | -12 | -11 |
| GO:003 | C | plastid thylakoid        | 25  | 293   | 1.40E | 2.70E |  |     |     |
| 1976   |   |                          |     |       |       |       |  | -12 | -11 |
| GO:003 | C | organelle subcompartment | 25  | 295   | 1.60E | 3.00E |  |     |     |

|        |   |                                |     |      |       |       |     |     |
|--------|---|--------------------------------|-----|------|-------|-------|-----|-----|
| 1984   |   |                                |     |      |       |       | -12 | -11 |
| GO:000 | C | extracellular region           | 24  | 285  | 5.20E | 9.10E |     |     |
| 5576   |   |                                |     |      |       |       | -12 | -11 |
| GO:004 | C | cytoplasmic part               | 146 | 6289 | 7.30E | 1.20E |     |     |
| 4444   |   |                                |     |      |       |       | -12 | -10 |
| GO:000 | C | cytosol                        | 42  | 912  | 1.40E | 2.30E |     |     |
| 5829   |   |                                |     |      |       |       | -11 | -10 |
| GO:004 | C | chloroplast part               | 37  | 746  | 3.30E | 5.30E |     |     |
| 4434   |   |                                |     |      |       |       | -11 | -10 |
| GO:004 | C | thylakoid membrane             | 21  | 244  | 7.70E | 1.20E |     |     |
| 2651   |   |                                |     |      |       |       | -11 | -09 |
| GO:005 | C | plastid thylakoid membrane     | 20  | 231  | 2.00E | 2.80E |     |     |
| 5035   |   |                                |     |      |       |       | -10 | -09 |
| GO:000 | C | chloroplast thylakoid membrane | 20  | 231  | 2.00E | 2.80E |     |     |
| 9535   |   |                                |     |      |       |       | -10 | -09 |
| GO:004 | C | plastid part                   | 37  | 867  | 1.80E | 2.50E |     |     |
| 4435   |   |                                |     |      |       |       | -09 | -08 |
| GO:000 | C | chloroplast envelope           | 20  | 265  | 1.80E | 2.50E |     |     |
| 9941   |   |                                |     |      |       |       | -09 | -08 |
| GO:004 | C | intracellular organelle        | 167 | 8149 | 2.10E | 2.80E |     |     |
| 3229   |   |                                |     |      |       |       | -09 | -08 |
| GO:004 | C | organelle                      | 167 | 8155 | 2.30E | 2.90E |     |     |
| 3226   |   |                                |     |      |       |       | -09 | -08 |
| GO:004 | C | protein complex                | 49  | 1443 | 6.00E | 7.50E |     |     |
| 3234   |   |                                |     |      |       |       | -09 | -08 |
| GO:000 | C | plastid envelope               | 20  | 331  | 6.00E | 7.40E |     |     |

|        |   |                                              |    |      |       |       |  |     |     |
|--------|---|----------------------------------------------|----|------|-------|-------|--|-----|-----|
| 9526   |   |                                              |    |      |       |       |  | -08 | -07 |
| GO:004 | C | intracellular non-membrane-bounded organelle | 37 | 1040 | 1.60E | 1.80E |  |     |     |
| 3232   |   |                                              |    |      |       |       |  | -07 | -06 |
| GO:004 | C | non-membrane-bounded organelle               | 37 | 1040 | 1.60E | 1.80E |  |     |     |
| 3228   |   |                                              |    |      |       |       |  | -07 | -06 |
| GO:000 | C | vacuolar membrane                            | 11 | 100  | 2.70E | 3.10E |  |     |     |
| 5774   |   |                                              |    |      |       |       |  | -07 | -06 |
| GO:003 | C | envelope                                     | 26 | 595  | 3.10E | 3.40E |  |     |     |
| 1975   |   |                                              |    |      |       |       |  | -07 | -06 |
| GO:003 | C | organelle envelope                           | 26 | 595  | 3.10E | 3.40E |  |     |     |
| 1967   |   |                                              |    |      |       |       |  | -07 | -06 |
| GO:004 | C | vacuolar part                                | 11 | 104  | 3.90E | 4.20E |  |     |     |
| 4437   |   |                                              |    |      |       |       |  | -07 | -06 |
| GO:000 | C | ribosome                                     | 24 | 524  | 4.00E | 4.20E |  |     |     |
| 5840   |   |                                              |    |      |       |       |  | -07 | -06 |
| GO:003 | C | ribonucleoprotein complex                    | 28 | 703  | 6.50E | 6.60E |  |     |     |
| 0529   |   |                                              |    |      |       |       |  | -07 | -06 |
| GO:000 | C | oxygen evolving complex                      | 6  | 21   | 1.20E | 1.20E |  |     |     |
| 9654   |   |                                              |    |      |       |       |  | -06 | -05 |
| GO:002 | C | cytosolic ribosome                           | 18 | 336  | 1.40E | 1.40E |  |     |     |
| 2626   |   |                                              |    |      |       |       |  | -06 | -05 |
| GO:004 | C | apoplast                                     | 13 | 182  | 2.20E | 2.10E |  |     |     |
| 8046   |   |                                              |    |      |       |       |  | -06 | -05 |
| GO:000 | C | chloroplast stroma                           | 15 | 249  | 2.80E | 2.60E |  |     |     |
| 9570   |   |                                              |    |      |       |       |  | -06 | -05 |
| GO:004 | C | cytosolic part                               | 18 | 360  | 3.60E | 3.30E |  |     |     |

|        |   |                                          |     |      |  |  |       |       |
|--------|---|------------------------------------------|-----|------|--|--|-------|-------|
| 4445   |   |                                          |     |      |  |  | -06   | -05   |
| GO:002 |   |                                          |     |      |  |  | 2.10E | 0.000 |
| 2625   | C | cytosolic large ribosomal subunit        | 11  | 162  |  |  | -05   | 19    |
| GO:000 |   |                                          |     |      |  |  | 2.60E | 0.000 |
| 9507   | C | chloroplast                              | 63  | 2740 |  |  | -05   | 23    |
| GO:003 |   |                                          |     |      |  |  | 3.40E | 0.000 |
| 3279   | C | ribosomal subunit                        | 17  | 389  |  |  | -05   | 3     |
| GO:000 |   |                                          |     |      |  |  | 5.00E | 0.000 |
| 9532   | C | plastid stroma                           | 15  | 322  |  |  | -05   | 43    |
| GO:000 |   |                                          |     |      |  |  | 9.60E | 0.000 |
| 5773   | C | vacuole                                  | 16  | 383  |  |  | -05   | 81    |
| GO:000 |   |                                          |     |      |  |  | 0.000 | 0.001 |
| 9536   | C | plastid                                  | 63  | 2965 |  |  | 23    | 9     |
| GO:000 |   |                                          |     |      |  |  | 0.000 | 0.002 |
| 5874   | C | microtubule                              | 5   | 38   |  |  | 25    |       |
| GO:004 |   |                                          |     |      |  |  | 0.000 | 0.002 |
| 4431   | C | Golgi apparatus part                     | 8   | 118  |  |  | 28    | 2     |
| GO:001 |   |                                          |     |      |  |  | 0.000 | 0.002 |
| 5934   | C | large ribosomal subunit                  | 11  | 225  |  |  | 33    | 6     |
| GO:000 |   |                                          |     |      |  |  | 0.000 | 0.003 |
| 5886   | C | plasma membrane                          | 36  | 1456 |  |  | 42    | 3     |
| GO:004 |   |                                          |     |      |  |  | 0.000 | 0.004 |
| 3227   | C | membrane-bounded organelle               | 133 | 7622 |  |  | 55    | 2     |
| GO:004 |   |                                          |     |      |  |  | 0.000 | 0.005 |
| 3231   | C | intracellular membrane-bounded organelle | 132 | 7615 |  |  | 75    | 7     |
| GO:000 |   |                                          |     |      |  |  | 0.002 | 0.016 |
|        | C | endoplasmic reticulum membrane           | 5   | 64   |  |  |       |       |

|        |   |                                                |    |     |       |   |       |  |
|--------|---|------------------------------------------------|----|-----|-------|---|-------|--|
| 5789   |   |                                                |    |     |       |   | 2     |  |
| GO:000 | C | Golgi apparatus                                | 11 | 293 | 0.002 |   | 0.019 |  |
| 5794   |   |                                                |    |     |       | 6 |       |  |
| GO:004 | C | nuclear envelope-endoplasmic reticulum network | 5  | 67  | 0.002 |   | 0.019 |  |
| 2175   |   |                                                |    |     |       | 7 |       |  |
| GO:000 | C | chromatin                                      | 5  | 71  | 0.003 |   | 0.024 |  |
| 0785   |   |                                                |    |     |       | 4 |       |  |
| GO:000 | C | cell wall                                      | 13 | 403 | 0.003 |   | 0.027 |  |
| 5618   |   |                                                |    |     |       | 9 |       |  |
| GO:003 | C | intrinsic to plasma membrane                   | 5  | 74  | 0.004 |   | 0.027 |  |
| 1226   |   |                                                |    |     |       |   |       |  |
| GO:003 | C | external encapsulating structure               | 13 | 407 | 0.004 |   | 0.028 |  |
| 0312   |   |                                                |    |     |       | 2 |       |  |
| GO:004 | C | endoplasmic reticulum part                     | 5  | 75  | 0.004 |   | 0.028 |  |
| 4432   |   |                                                |    |     |       | 2 |       |  |
| GO:000 | C | endoplasmic reticulum                          | 14 | 466 | 0.005 |   | 0.034 |  |
| 5783   |   |                                                |    |     |       | 1 |       |  |
| GO:001 | C | plastoglobule                                  | 5  | 81  | 0.005 |   | 0.037 |  |
| 0287   |   |                                                |    |     |       | 7 |       |  |

---

**Note:** Enriched GO terms were generated in agriGO with customized annotation as reference. p-values were converted with Z-score generated by z-test. FDR were generated as p-value with multiple test correction.

**Supplementary Table s6.** Comparison of protein and mRNA expression pattern of 15 candidate proteins (genes) at different developmental stages

| Protein accession | Description | iTRAQ (8 × plex) |        |          |          |                    |        |          |          | RT-PCR    |        |          |          |                    |        |          |       |
|-------------------|-------------|------------------|--------|----------|----------|--------------------|--------|----------|----------|-----------|--------|----------|----------|--------------------|--------|----------|-------|
|                   |             | Danfeng-2        |        |          |          | Cabernet Sauvignon |        |          |          | Danfeng-2 |        |          |          | Cabernet Sauvignon |        |          |       |
|                   |             | Green            | Before | Veraison | Ripe     | Green              | Before | Veraison | Ripe     | Green     | Before | Veraison | Ripe     | Green              | Before | Veraison | Ripe  |
| hard              | Veraison    |                  |        | hard     | Veraison |                    |        | hard     | Veraison |           |        | hard     | Veraison |                    |        |          |       |
| A5BGJ0            | DFR         | 1.000            | 0.827  | 0.751    | 1.115    | 2.186              | 0.726  | 1.878    | 1.519    | 0.095     | 0.070  | 0.075    | 0.148    | 0.139              | 0.037  | 1.000    | 0.137 |
| A5BMU2            | CHI1        | 1.000            | 0.956  | 0.995    | 0.903    | 1.898              | 0.943  | 1.536    | 1.756    | 0.106     | 0.140  | 0.080    | 0.140    | 0.192              | 0.046  | 1.000    | 0.409 |
| A5ANT9            | CHI2        | 1.000            | 0.900  | 0.899    | 0.752    | 1.561              | 0.910  | 1.116    | 1.642    | 0.135     | 0.091  | 0.141    | 0.094    | 0.184              | 0.035  | 1.000    | 0.289 |
| A2ICC9            | LDOX        | 1.000            | 0.971  | 1.040    | 0.993    | 1.977              | 0.946  | 1.973    | 1.758    | 0.114     | 0.080  | 0.114    | 0.158    | 0.210              | 0.104  | 1.000    | 0.242 |
| G4XGW2            | CHS         | 1.000            | 0.825  | 0.810    | 0.706    | 1.827              | 0.733  | 3.971    | 2.818    | 0.020     | 0.007  | 0.006    | 0.003    | 0.113              | 0.001  | 1.000    | 0.248 |
| Q2L7J4            | F35'H1      | 1.000            | 1.125  | 0.756    | 1.012    | 1.759              | 1.057  | 0.993    | 1.972    | 0.020     | 0.004  | 0.020    | 0.002    | 0.068              | 0.003  | 1.000    | 0.086 |
| F6HA89            | F35'H2      | 1.000            | 0.928  | 1.120    | 1.298    | 1.909              | 1.324  | 1.300    | 2.962    | 1.029     | 0.915  | 0.494    | 0.651    | 0.565              | 0.534  | 0.333    | 1.128 |
| A5BZR3            | F3H         | 1.000            | 0.945  | 1.162    | 0.921    | 1.956              | 0.918  | 1.622    | 1.704    | 0.029     | 0.028  | 0.055    | 0.022    | 0.178              | 0.007  | 1.000    | 0.132 |
| A5BRL4            | C4H         | 1.000            | 0.954  | 1.046    | 0.904    | 1.230              | 0.939  | 1.360    | 1.786    | 0.047     | 0.056  | 0.325    | 0.138    | 0.144              | 0.061  | 1.000    | 0.428 |
| A5BIH9            | RSGT        | 1.000            | 0.815  | 1.113    | 1.994    | 0.997              | 0.875  | 0.889    | 0.938    | 0.402     | 0.416  | 0.581    | 2.564    | 1.286              | 0.211  | 0.148    | 0.037 |
| A5BBF4            | UBC32       | 1.000            | 0.947  | 1.029    | 1.334    | 0.985              | 1.011  | 1.662    | 1.320    | 0.764     | 0.580  | 0.488    | 0.954    | 0.278              | 0.361  | 0.590    | 1.000 |
| A5BFQ1            | LRR         | 1.000            | 0.987  | 0.973    | 0.835    | 1.013              | 0.781  | 1.997    | 1.609    | 0.528     | 0.502  | 0.798    | 0.272    | 1.173              | 0.649  | 1.893    | 0.245 |
| A5AI47            | GRP         | 1.000            | 0.760  | 1.667    | 7.442    | 1.657              | 1.177  | 0.965    | 4.355    | 0.171     | 0.047  | 1.738    | 0.250    | 0.000              | 0.007  | 0.068    | 1.000 |
| A3FA68            | PIP2;3      | 1.000            | 0.906  | 0.897    | 1.833    | 1.000              | 1.032  | 2.299    | 2.423    | 0.063     | 0.005  | 0.007    | 0.341    | 0.116              | 0.097  | 0.792    | 1.000 |
| D7TA35            | USP         | 1.000            | 1.117  | 1.003    | 1.437    | 1.059              | 1.124  | 1.160    | 0.903    | 1.368     | 1.553  | 1.125    | 1.013    | 1.286              | 0.657  | 1.587    | 0.602 |

Note: RT-PCR data are log<sub>2</sub> normalized 2<sup>-ΔΔCt</sup> values. Relationships of proteins with qRT-PCR transcripts are indicated.
